# Supplementary material for: Organocatalysts and sequential asymmetric cascade reactions in the synthesis of functionalized isoindolinones and benzoindolizidinones
Source: Royal Society of Chemistry journal article supplement (doi:10.1039/c3ra43074j), 2013-01-01

## Supporting information

### Organocatalysts and sequential asymmetric cascade reactions in the synthesis of functionalized isoindolinones and benzoindolizidinones.

Silvia Tiso,<sup>a</sup> Laura Palombi,<sup>a</sup> Chiara Vignes,<sup>a</sup> Antonia Di Mola<sup>a</sup> and Antonio Massa<sup>a\*</sup>

*Dipartimento di Chimica e Biologia, Università di Salerno, Via Giovanni Paolo II, 132, 84084-Fisciano (SA)-Italy. Tel: +39-089-969565. Fax: +39-089-969-603 E-mail: amassa@unisa.it*

#### Supporting Information

##### Table of contents:

|                                                 |       |
|-------------------------------------------------|-------|
| <sup>1</sup> H-NMR and <sup>13</sup> C-NMR..... | 2-13  |
| HPLC traces.....                                | 14-24 |

**Diiso propyl 2-(1-oxoisindolin-3-yl)malonate. (3b)**

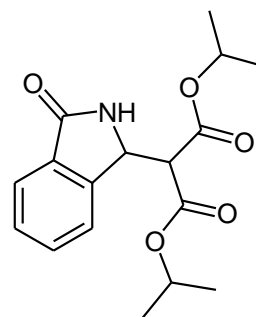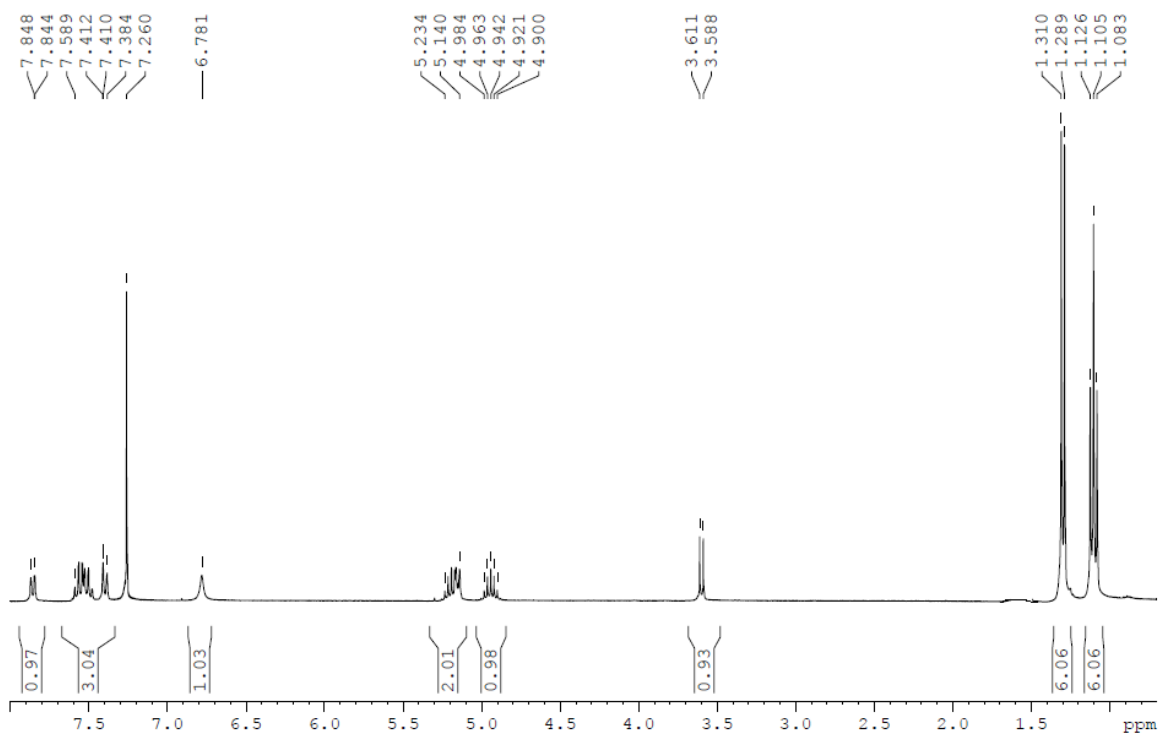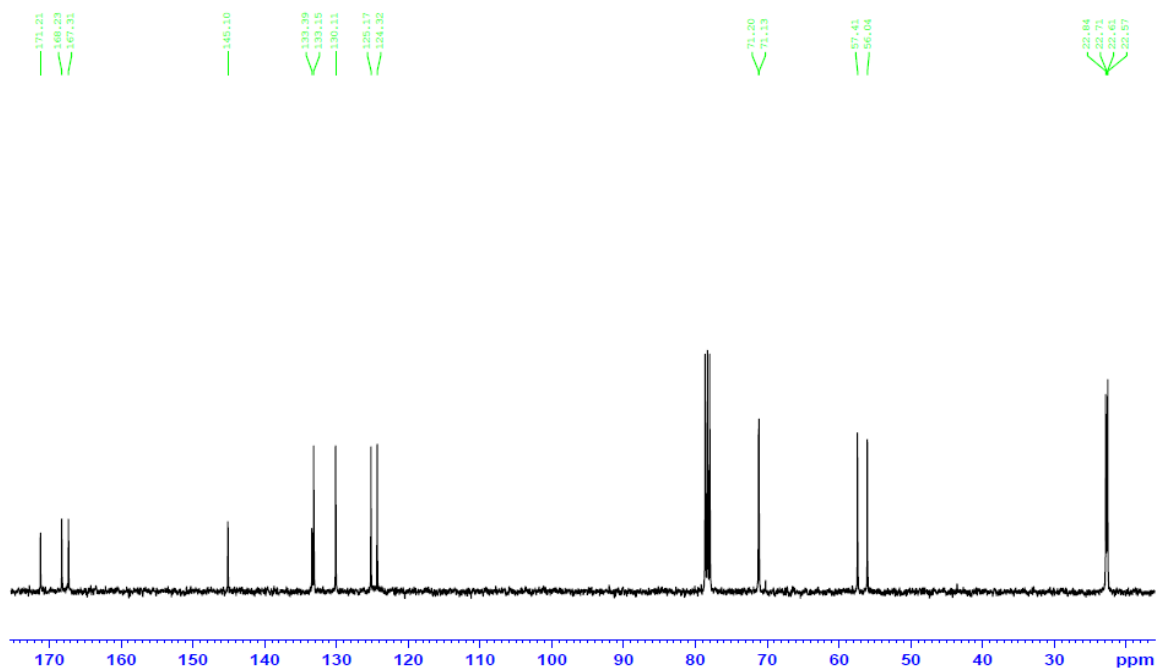

**Dimethyl 2-(5-bromo-3-oxoisindolin-1-yl)malonate. (3c)**

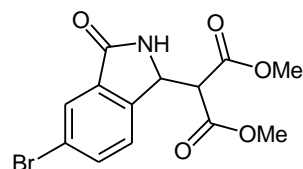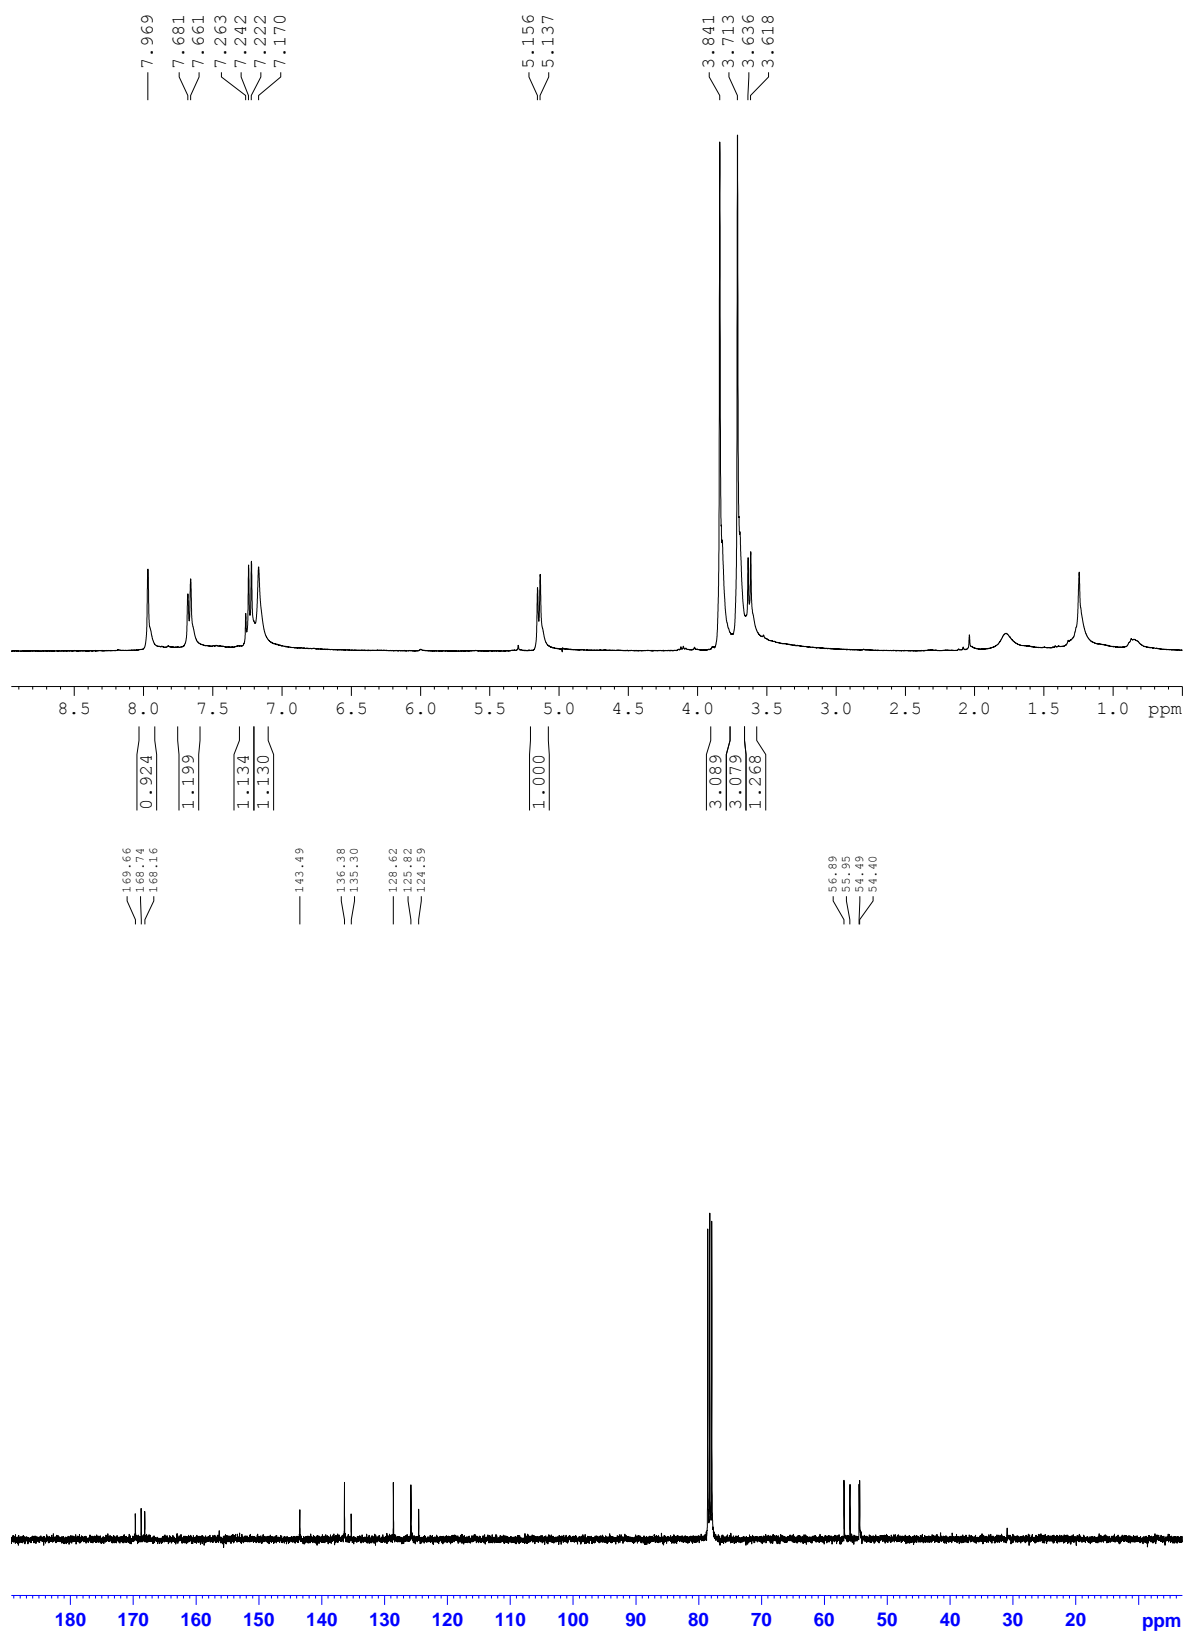

**Diiso propyl 2-(5-bromo-1-oxoisindolin-3-yl)malonate. (3d)**

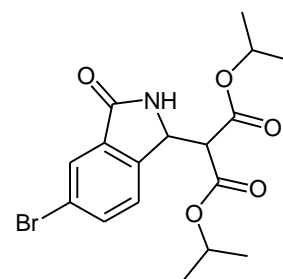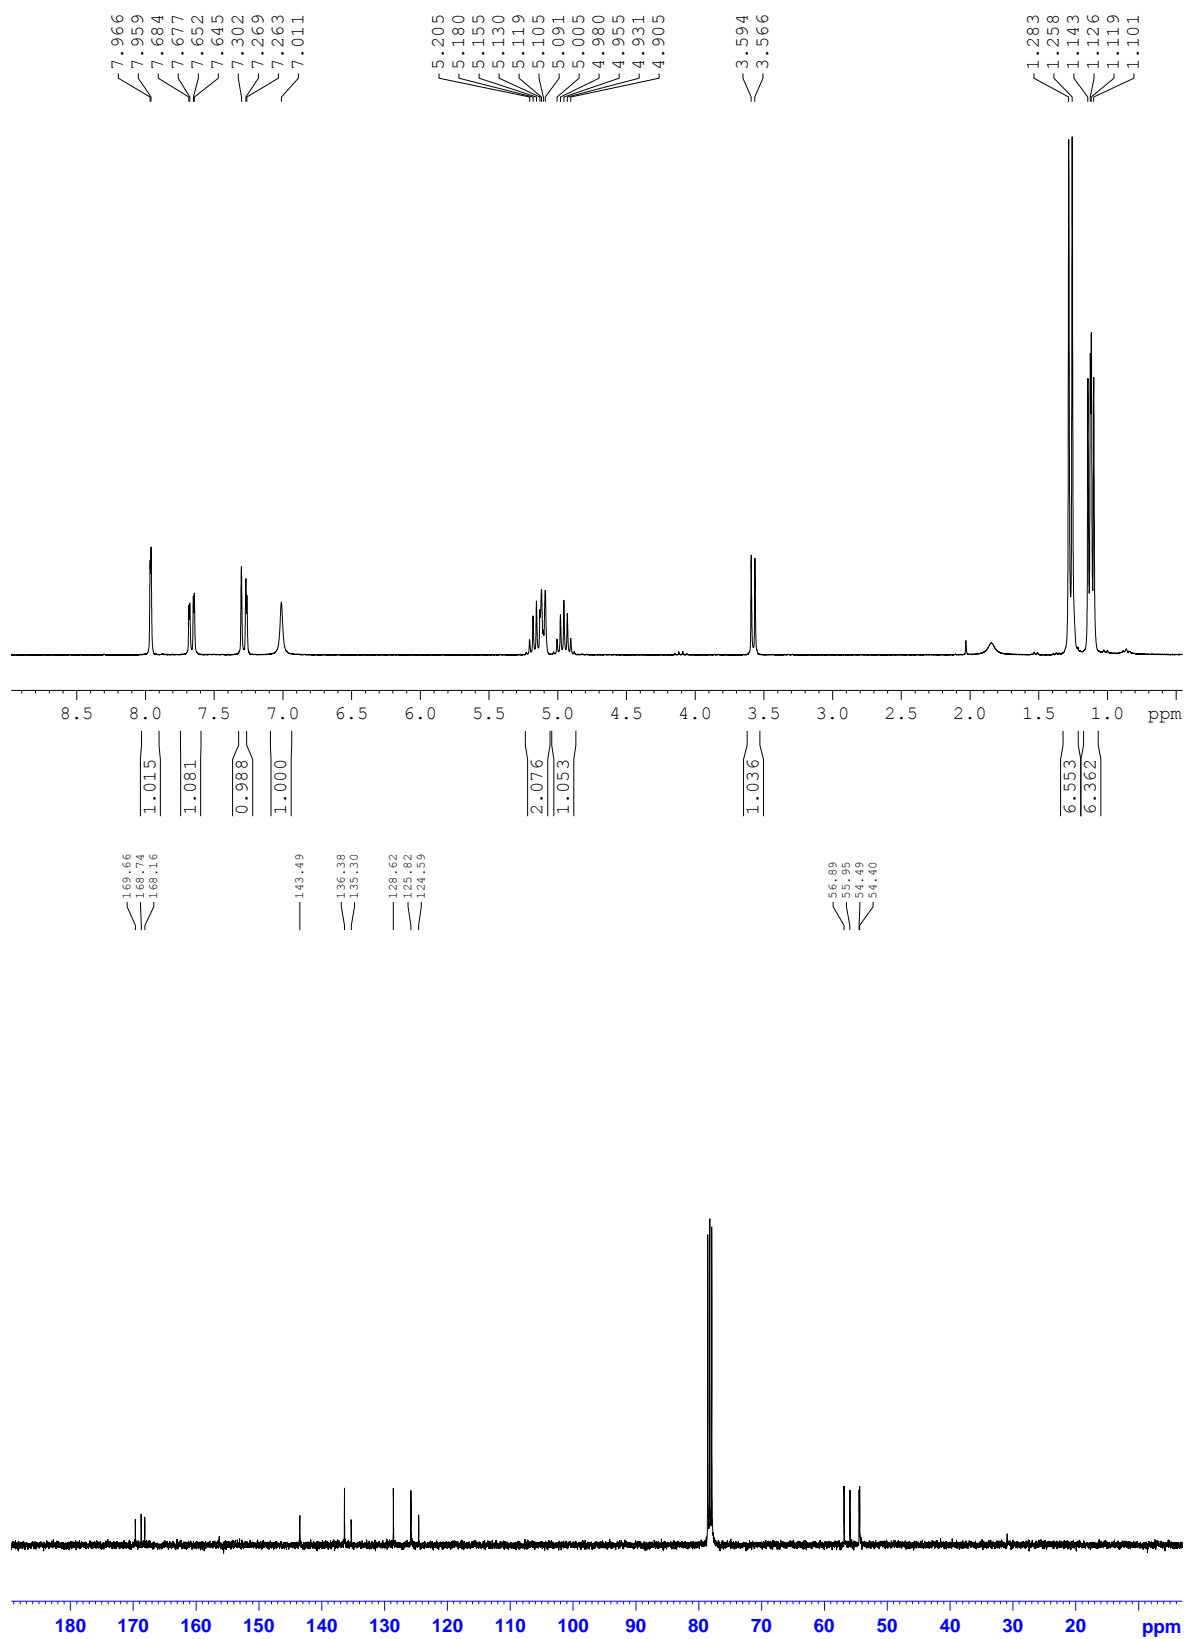

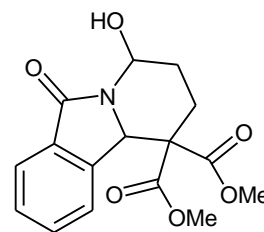

**Dimethyl 3,4-dihydro-4-hydroxy-6-oxopyrido[2,1-a]isoindole-1,1(2H,6H,10bH)-dicarboxylate. (5a)**

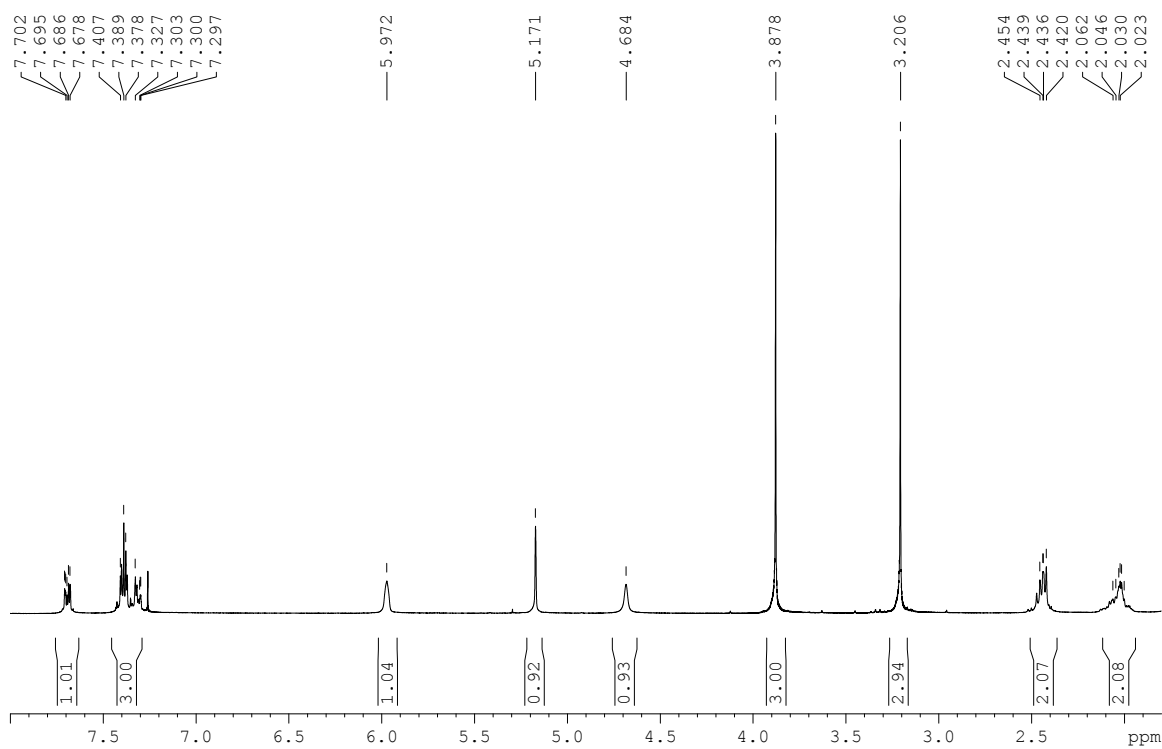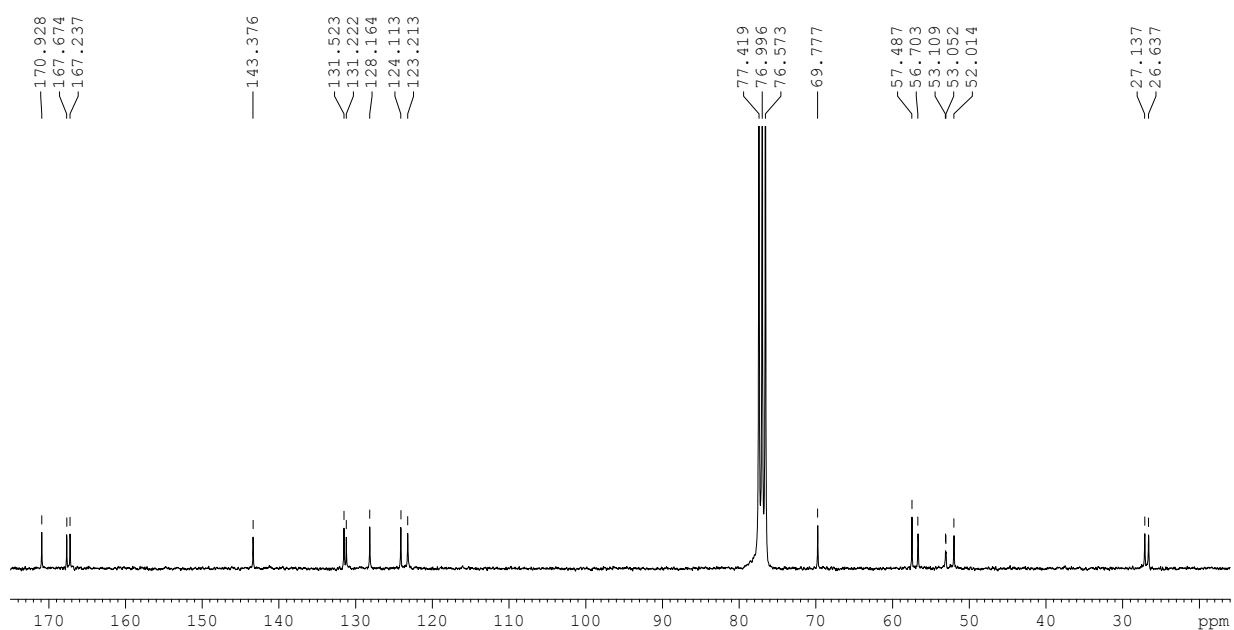

**Dimethyl 8-bromo-3,4-dihydro-4-hydroxy-6-oxopyrido[2,1-a]isoindole-1,1(2H,6H,10bH)-dicarboxylate. (5b)**

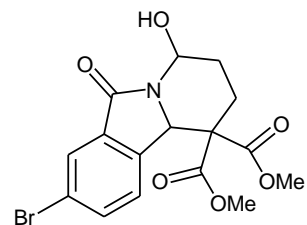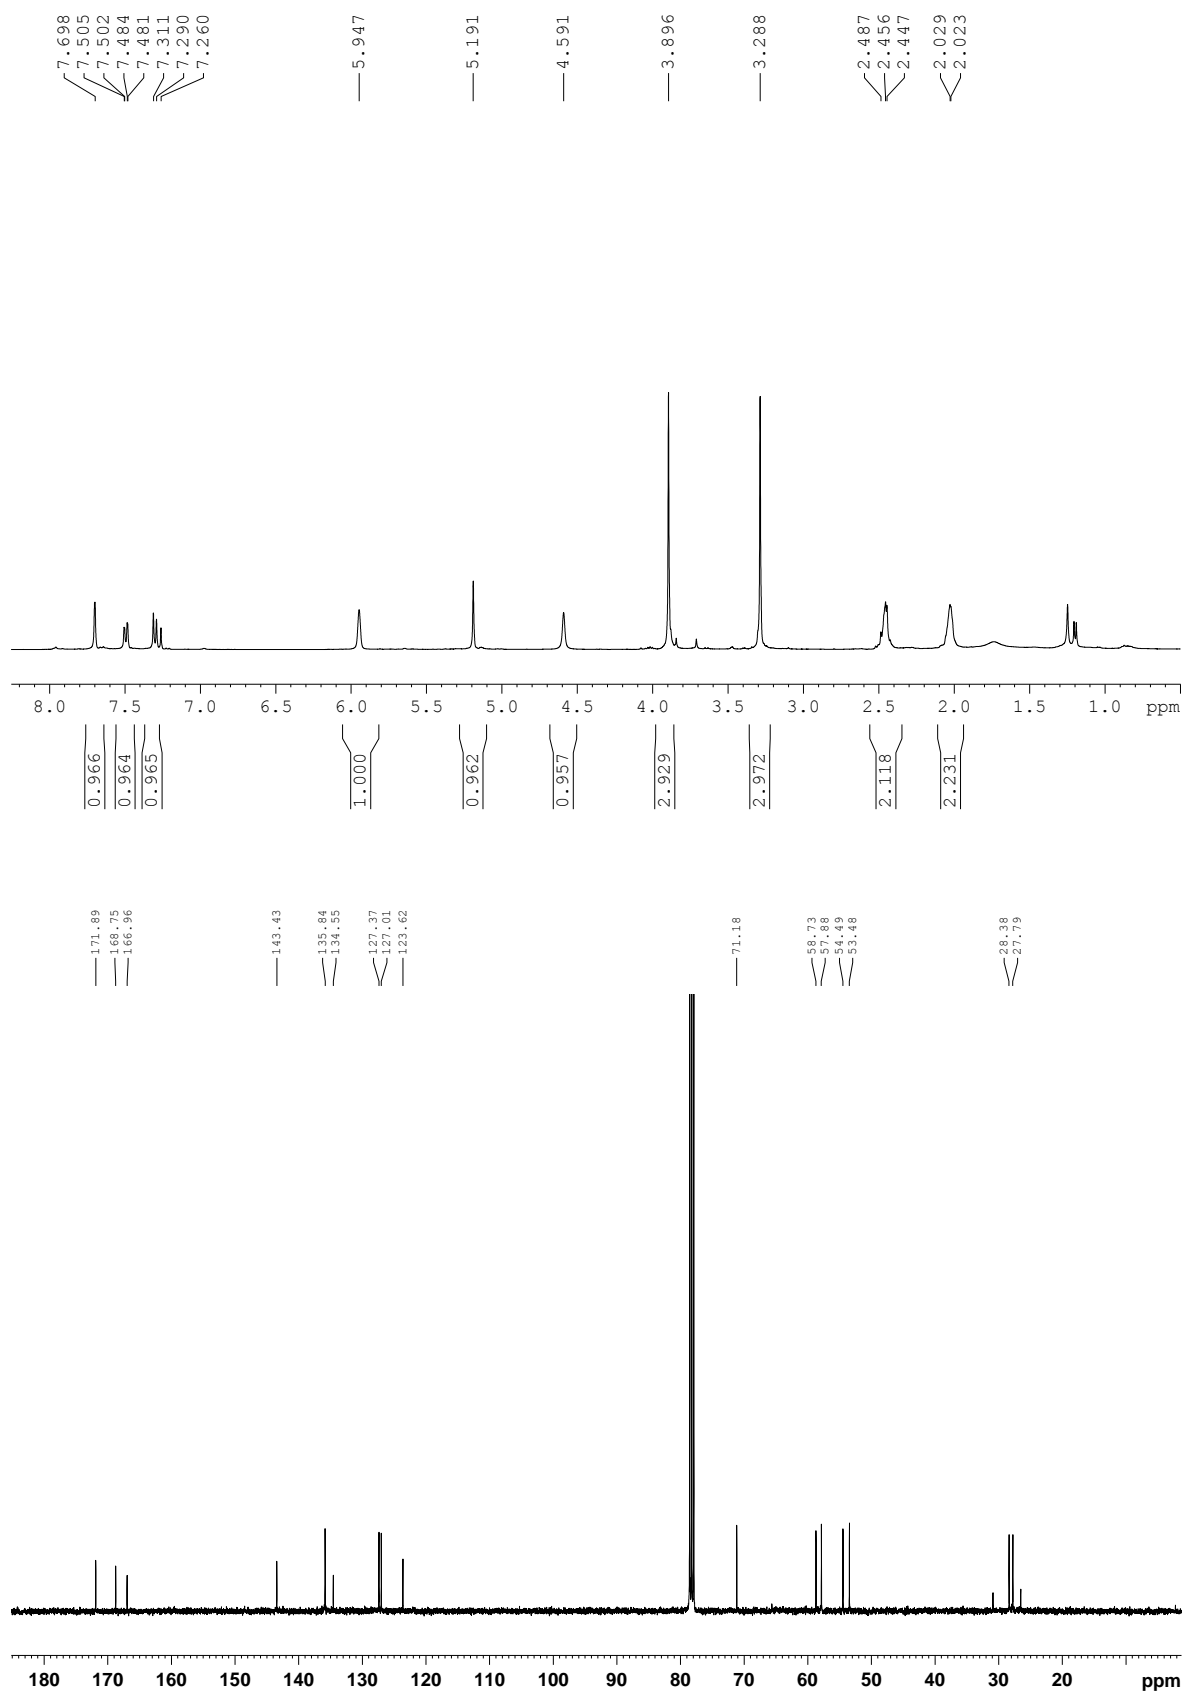

**(R)-Dimethyl 3,4-dihydro-4,6-dioxopyrido[2,1-a]isoindole-1,1(2H,6H)-dicarboxylate. (6)**

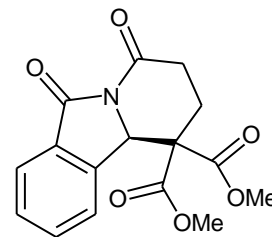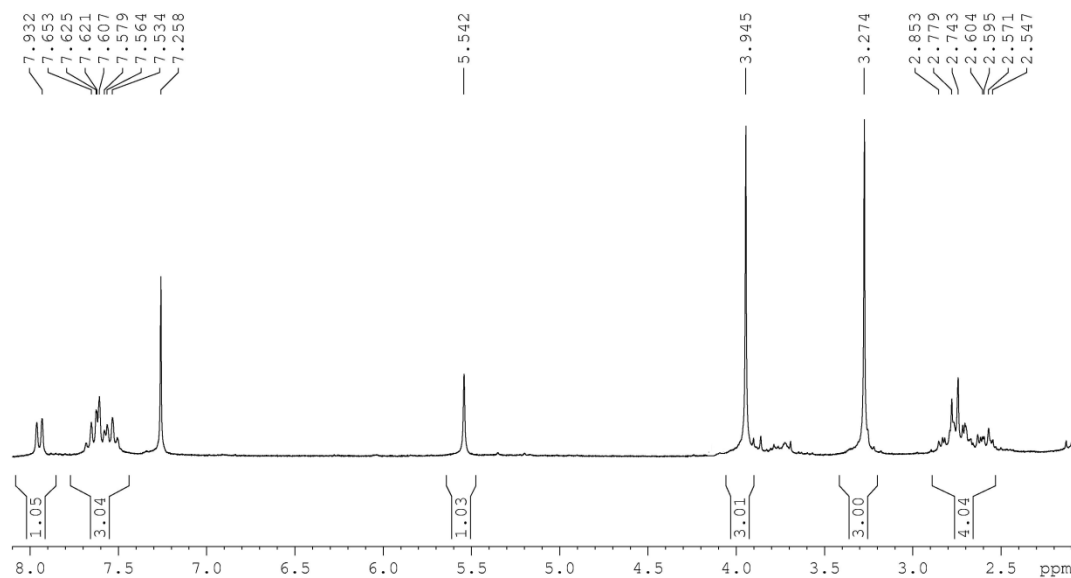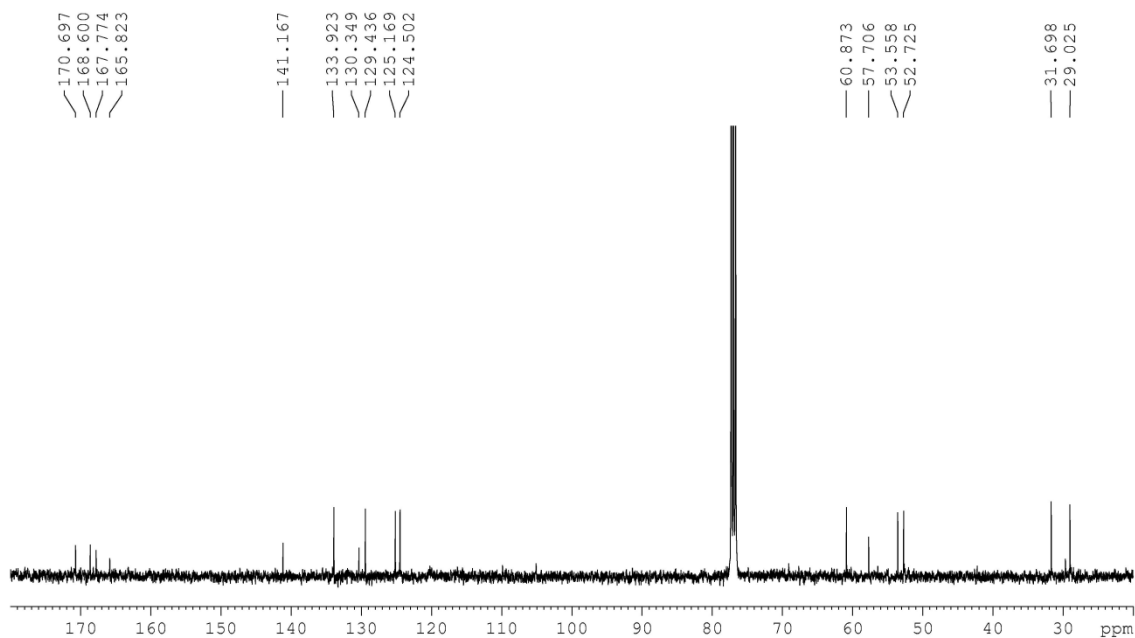

**(R)-Dimethyl 6-oxopyrido[2,1-a]isoindole-1,1(2H,6H,10bH)-dicarboxylate. (7)**

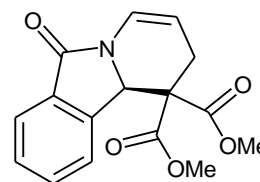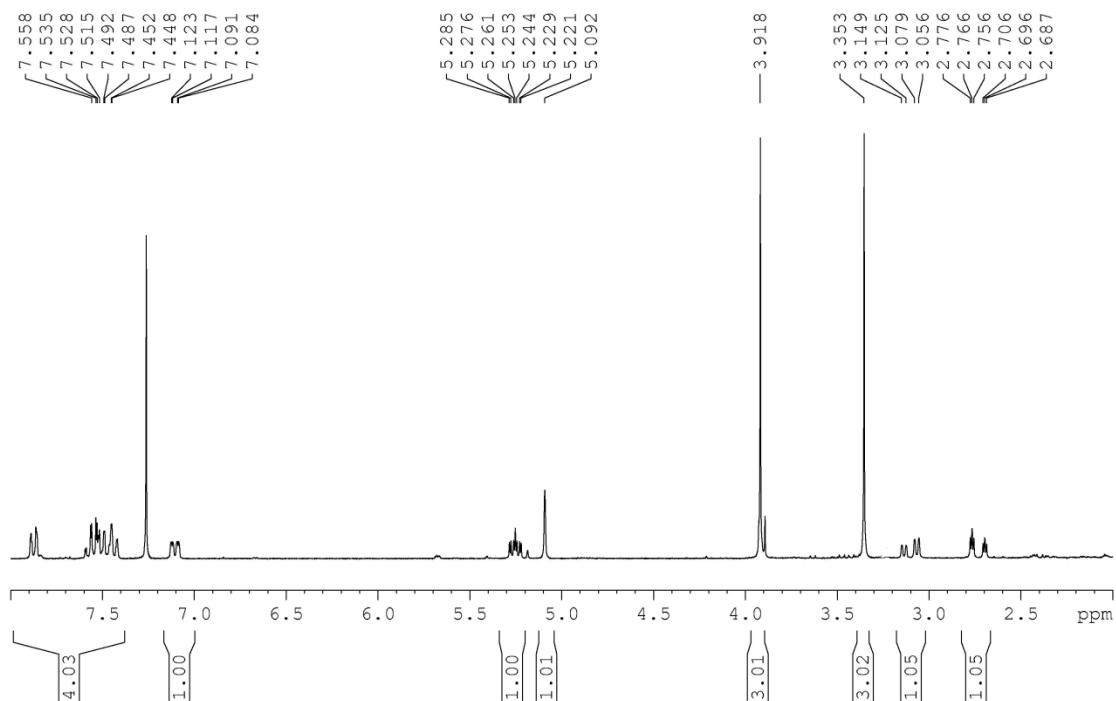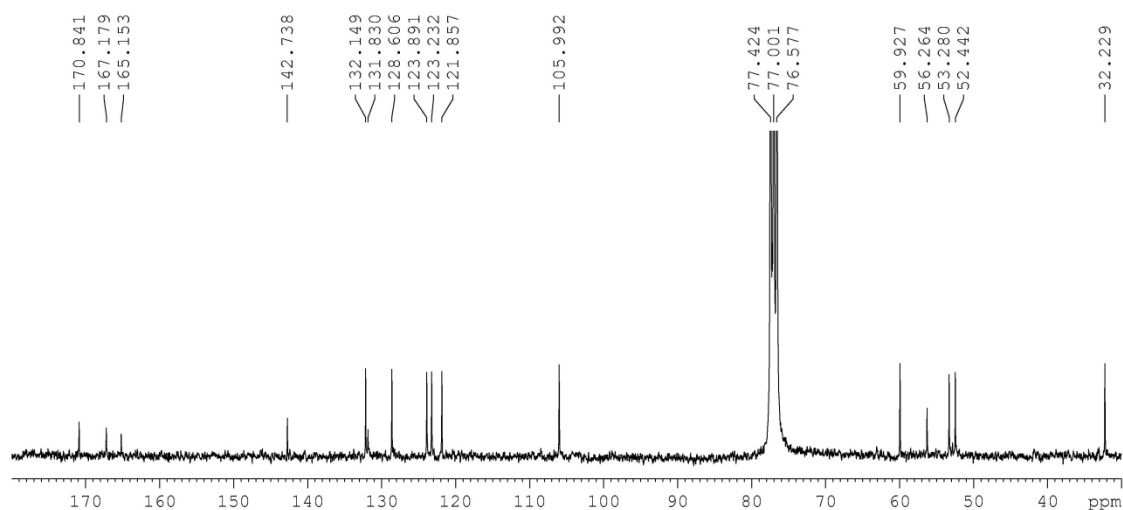



**(*R, R, R*)-Dimethyl 3-(3-chlorobenzoyloxy)-3,4-dihydro-4-hydroxy-6-oxopyrido[2,1-*a*]isoindole-1,1(2*H*,6*H*,10*bH*)-dicarboxylate. (8)**

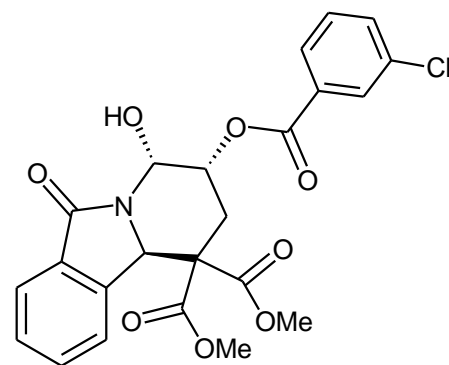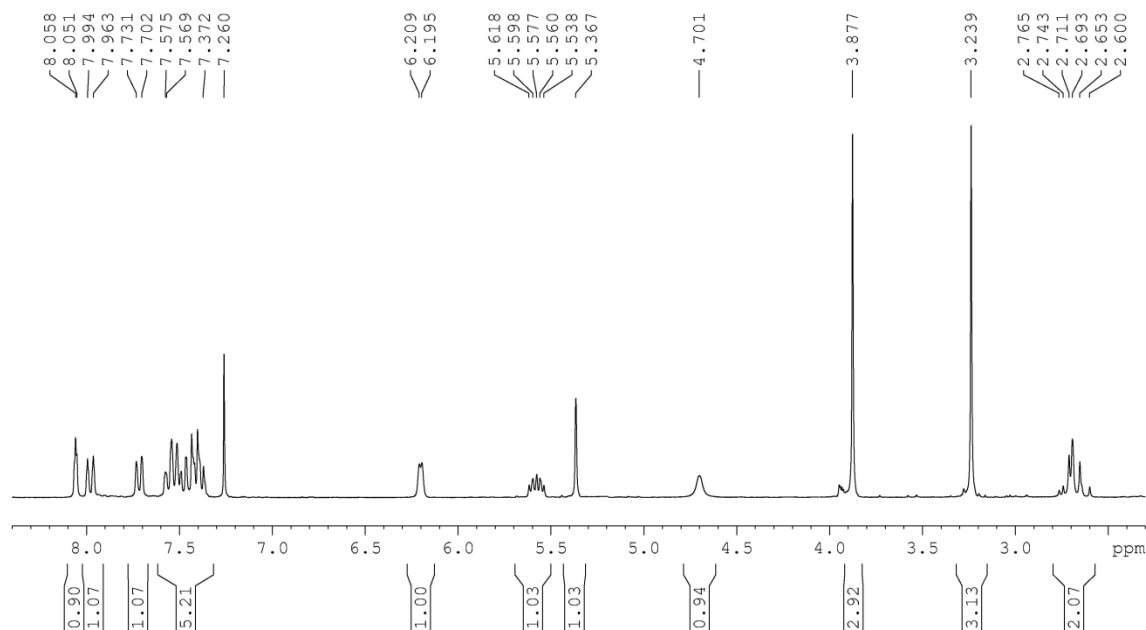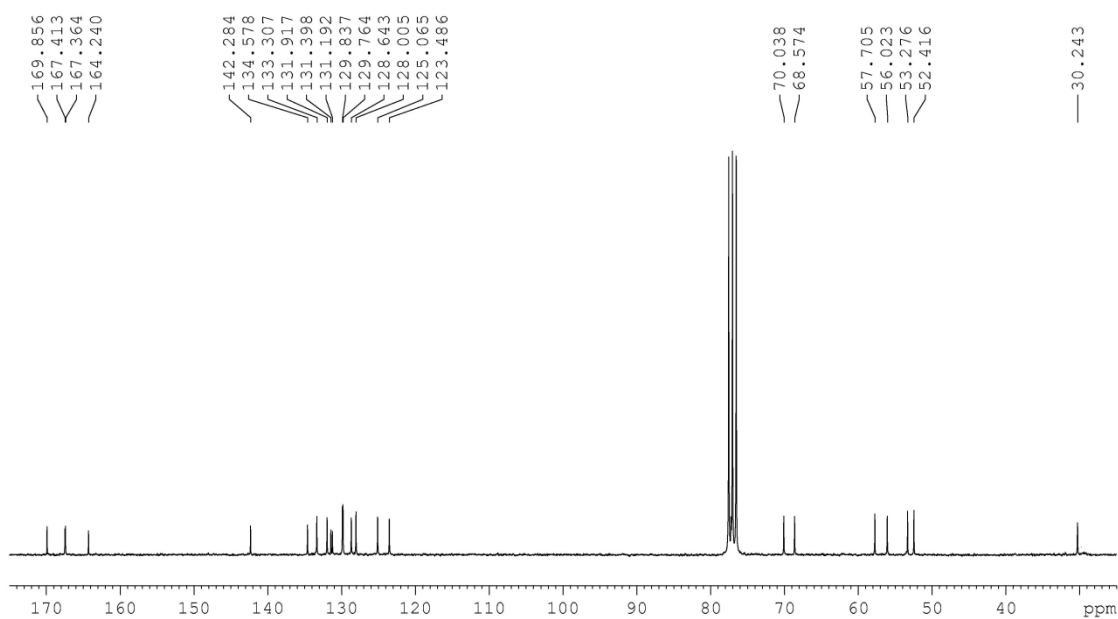

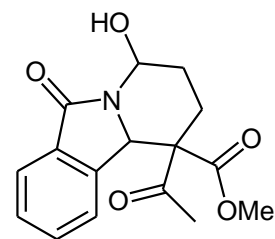

**Methyl 1-acetyl-1,2,3,4,6,10b-hexahydro-4-hydroxy-6-oxopyrido[2,1-a]isoindole-1-carboxylate. (11a)**

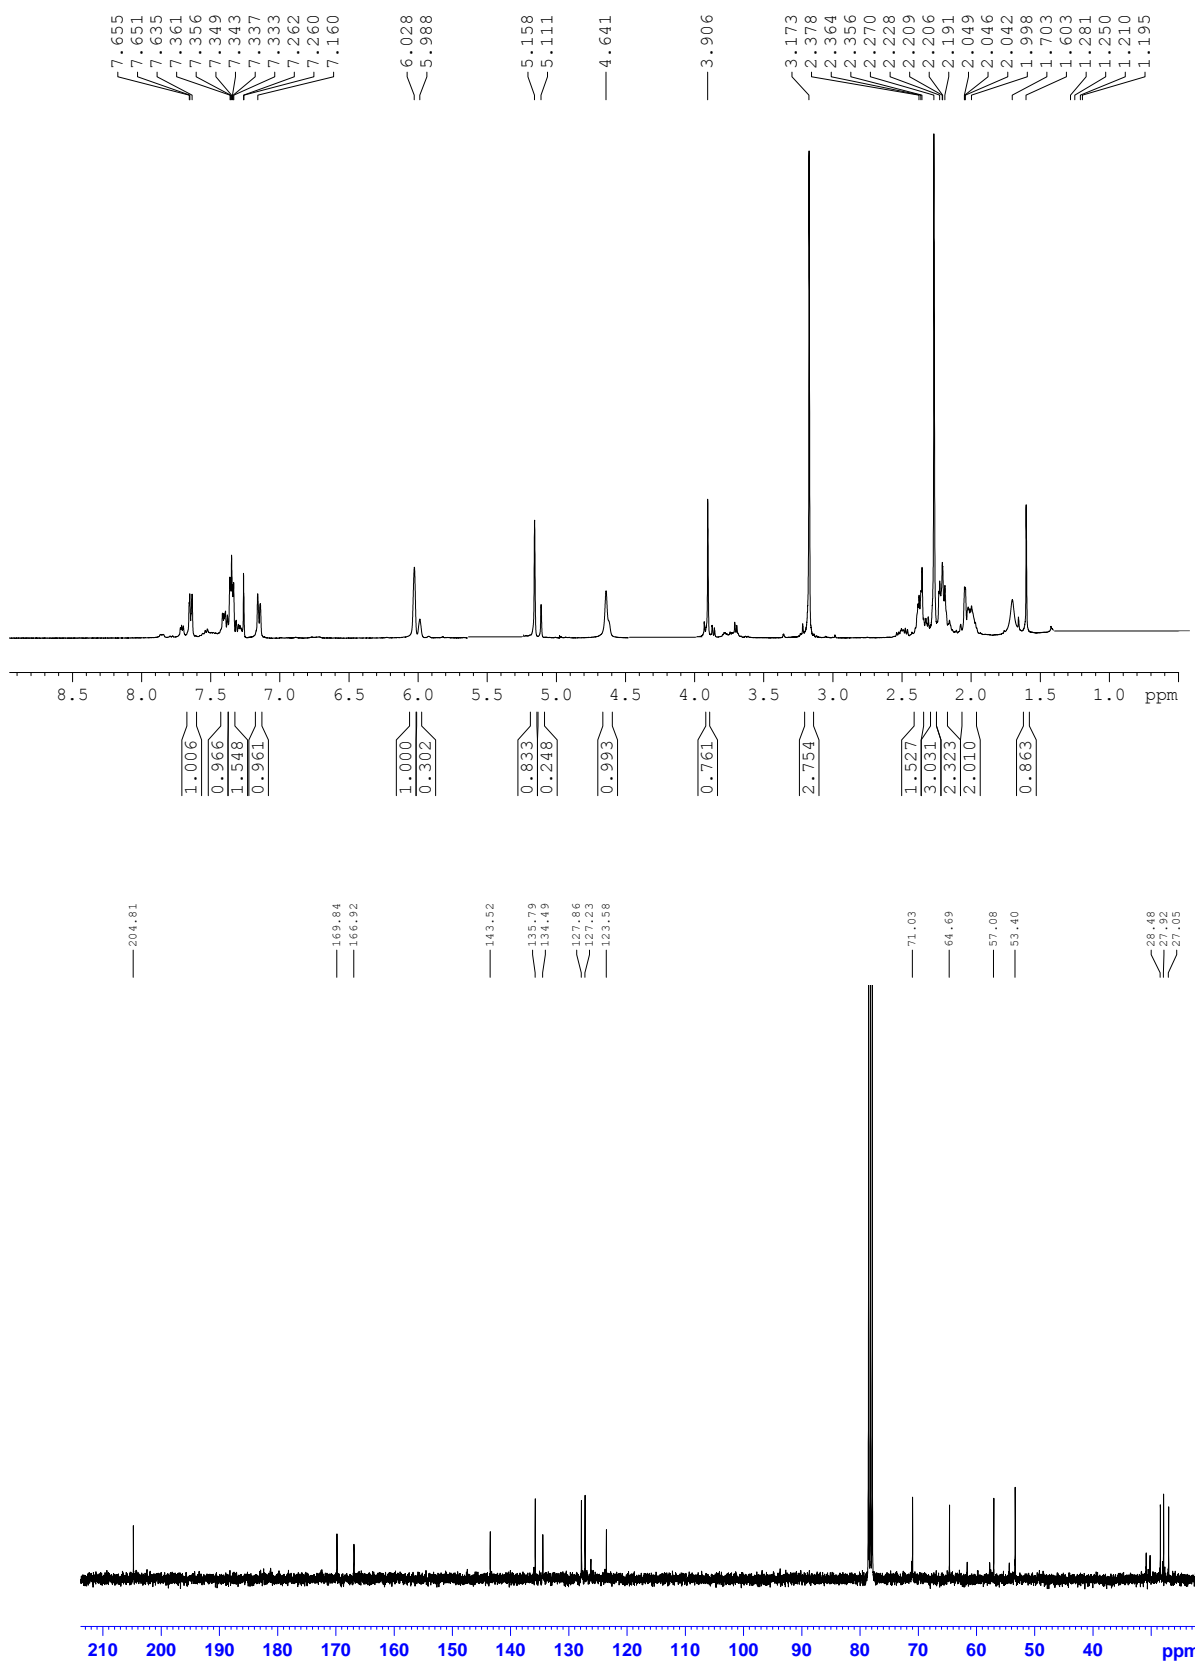

***tert*-Butyl 1-acetyl-4-hydroxy-6-oxo-1,2,3,4,6,10b-hexahydropyrido[2,1-*a*]isoindole-1-carboxylate. (11b)**

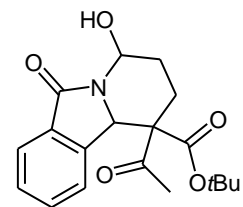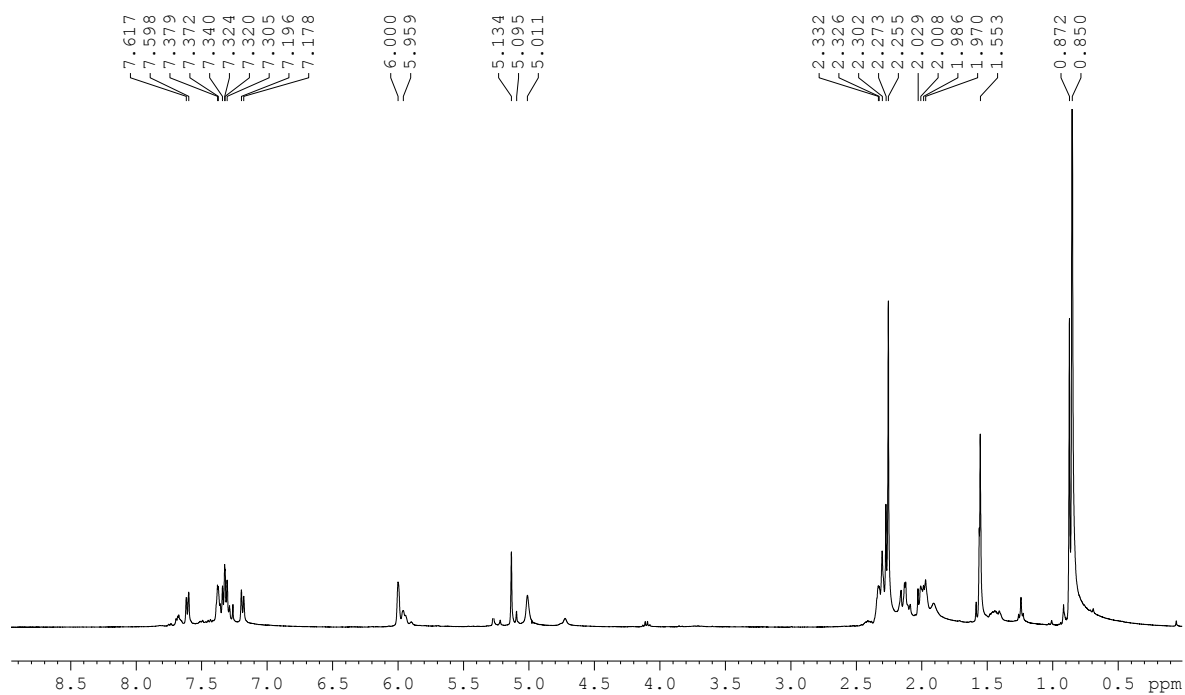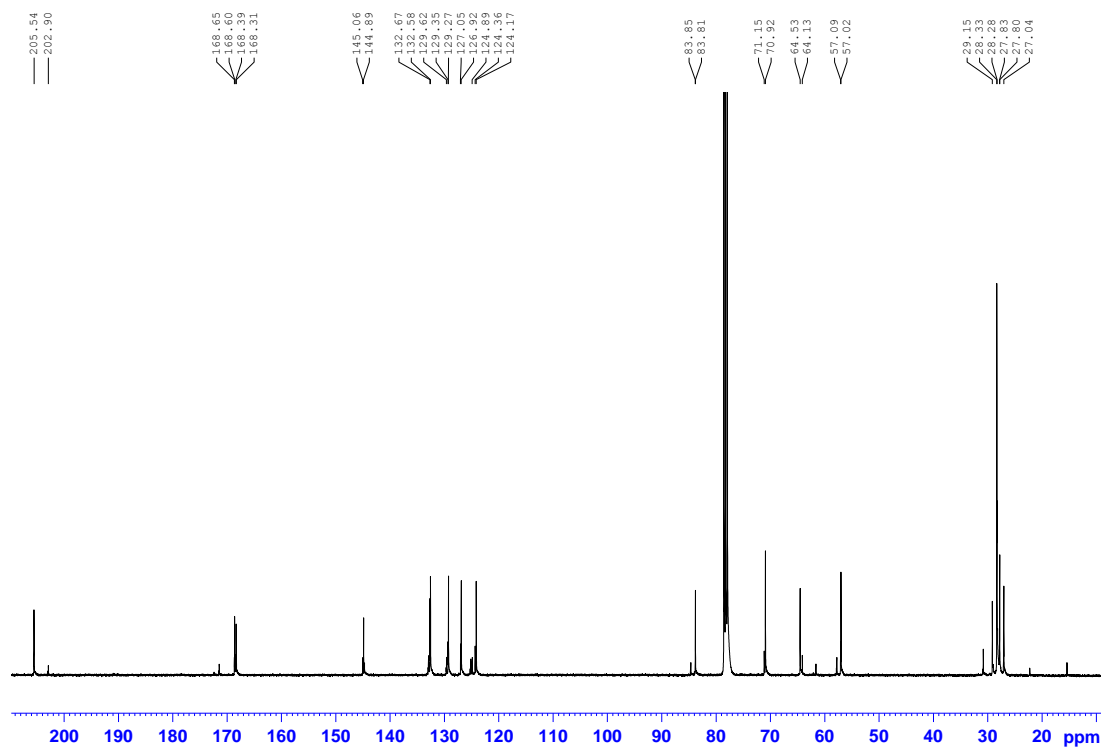

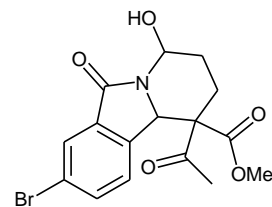

**Methyl 1-acetyl-8-bromo-4-hydroxy-6-oxo-1,2,3,4,6,10b-hexahydropyrido[2,1-a]isoindole-1-carboxylate. (11c)**

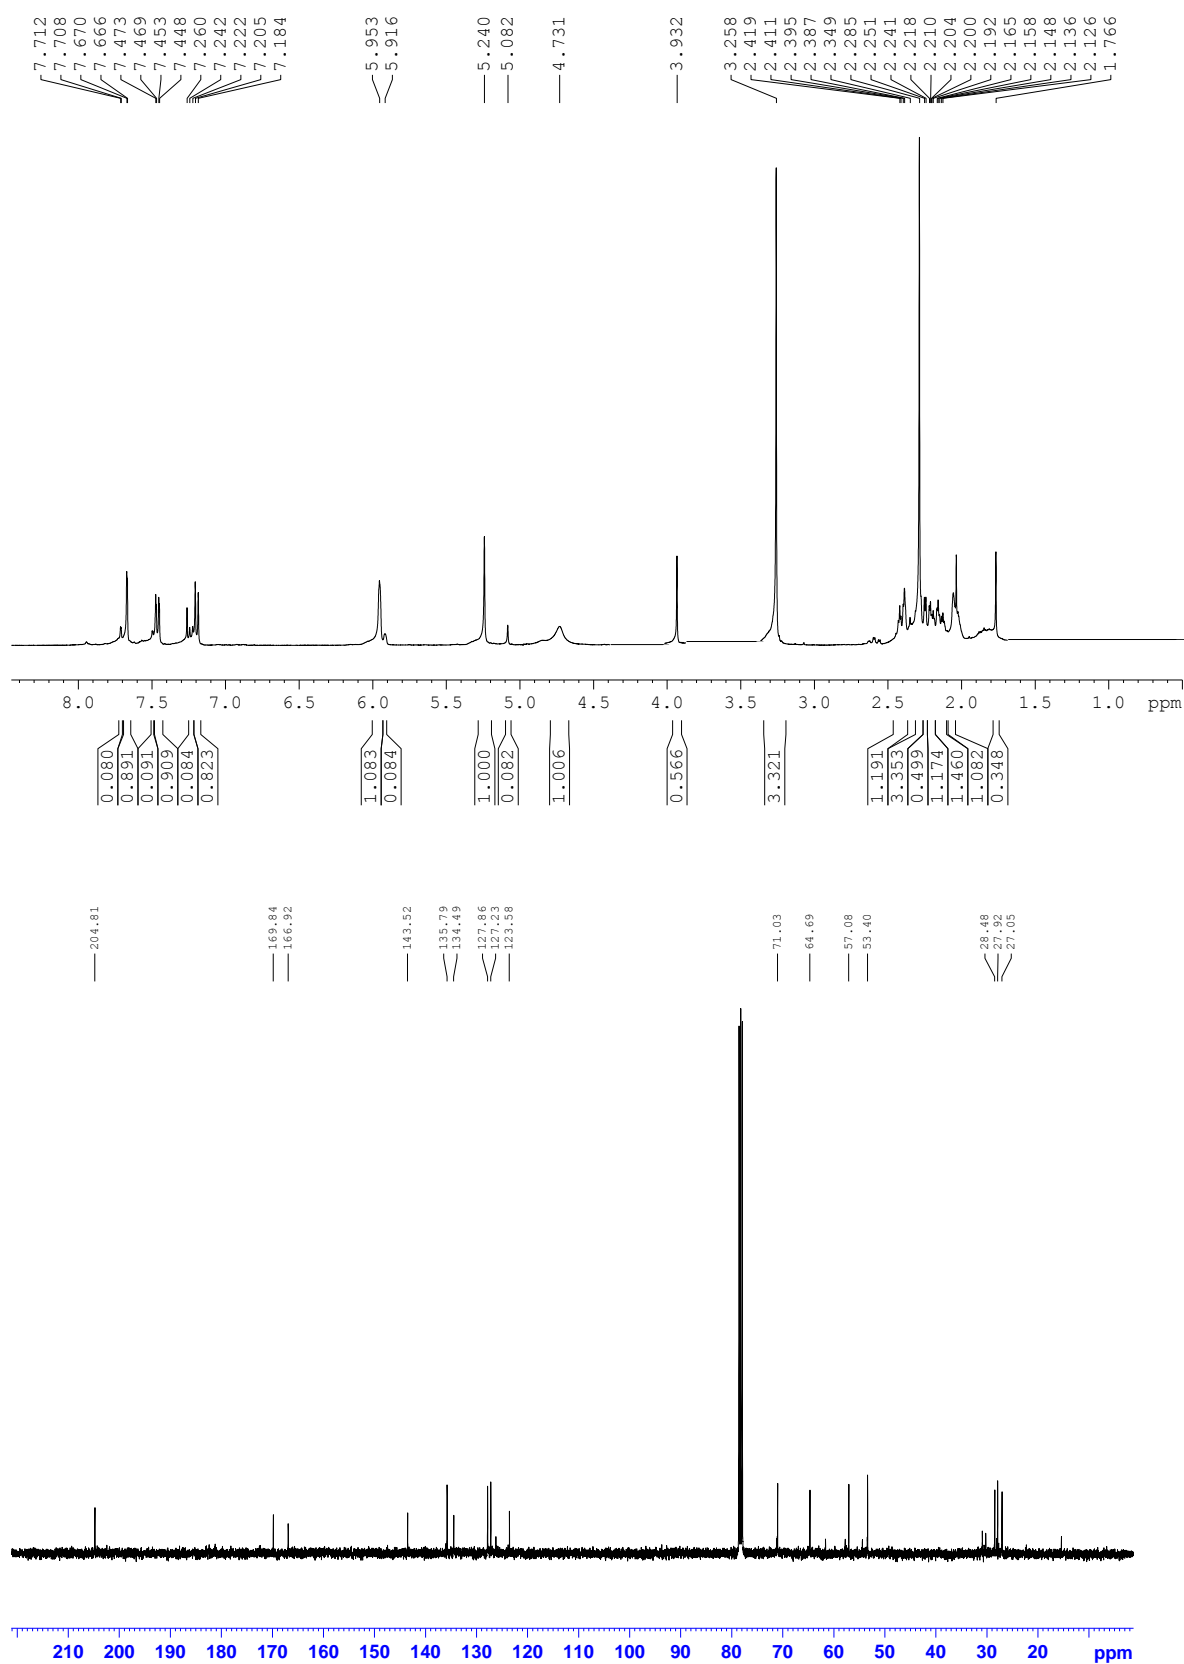

***tert*-Butyl 1-acetyl-8-bromo-4-hydroxy-6-oxo-1,2,3,4,6,10b-hexahydropyrido[2,1-a]isoindole-1-carboxylate. (11d)**

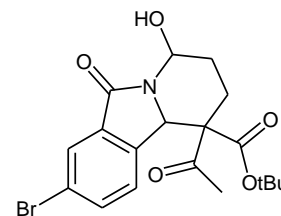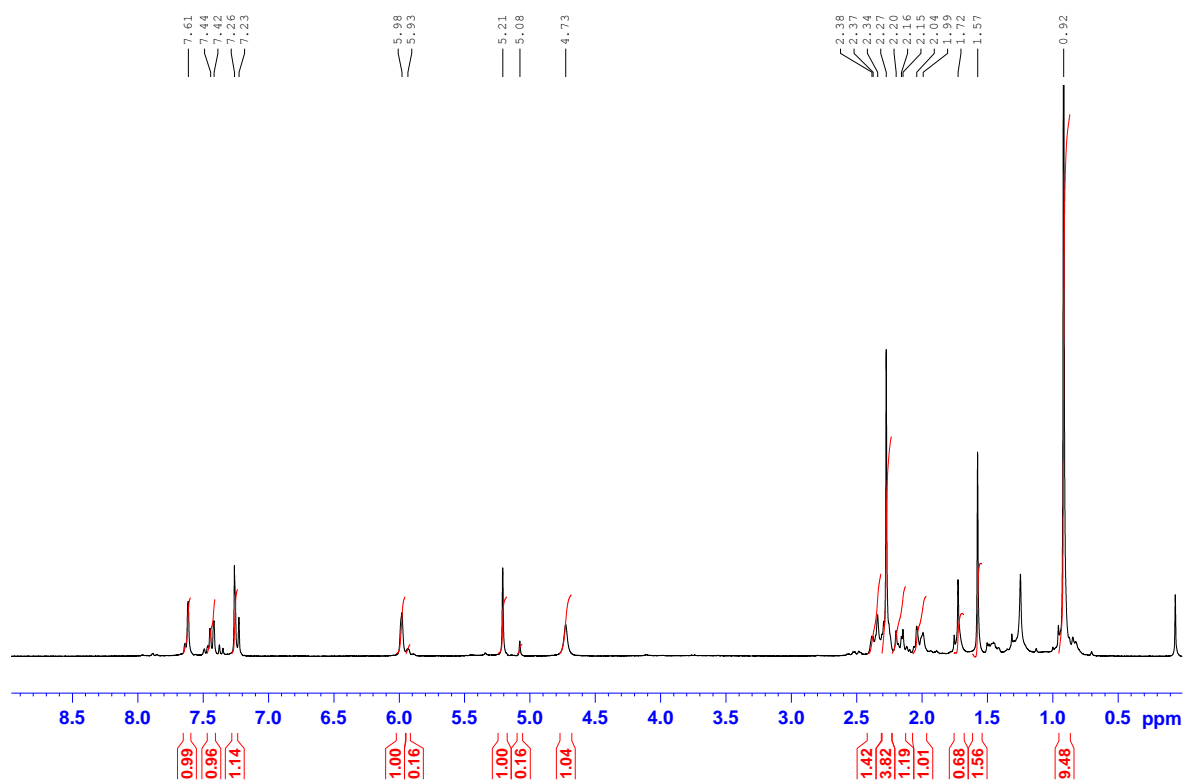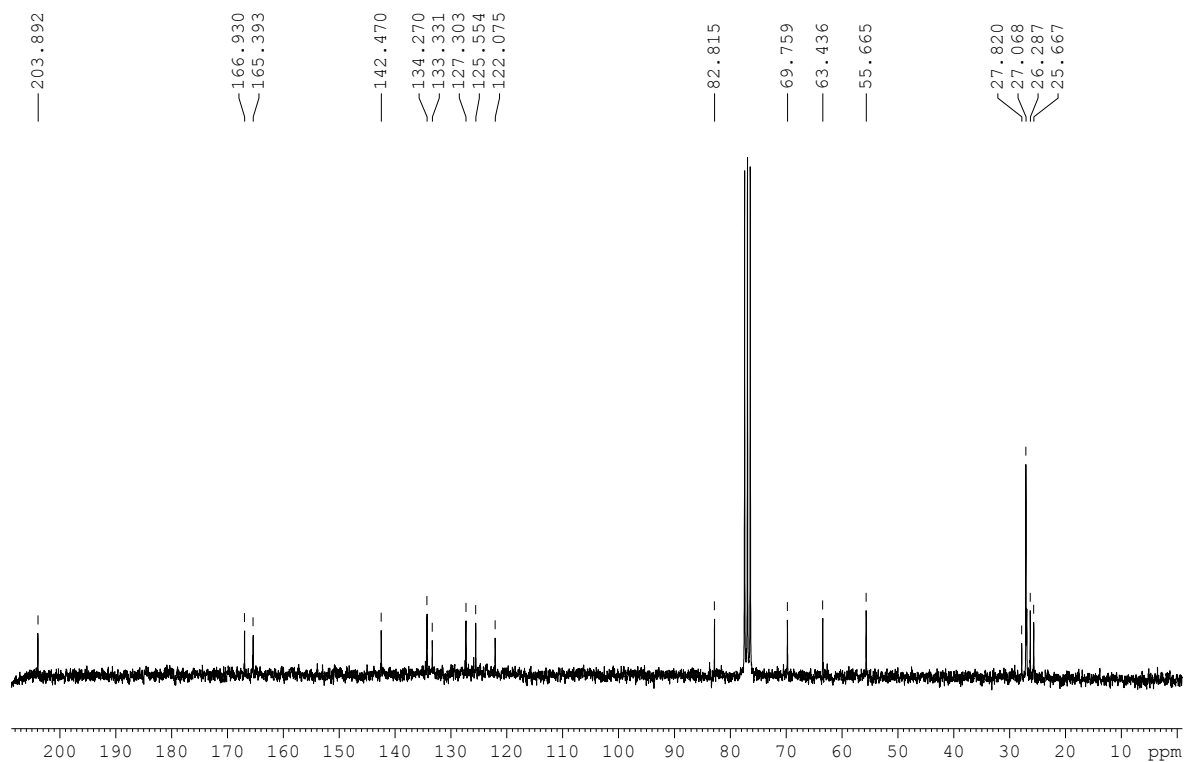

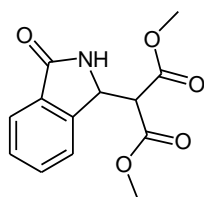

HPLC trace of racemic **3a**:

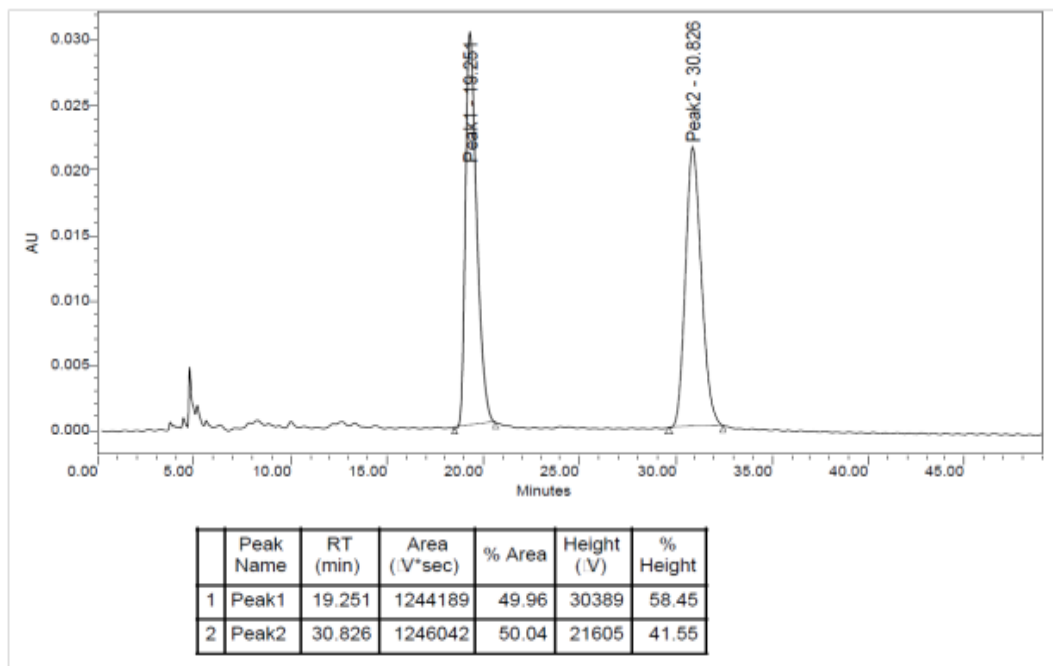

HPLC trace of enantioenriched **3a**:

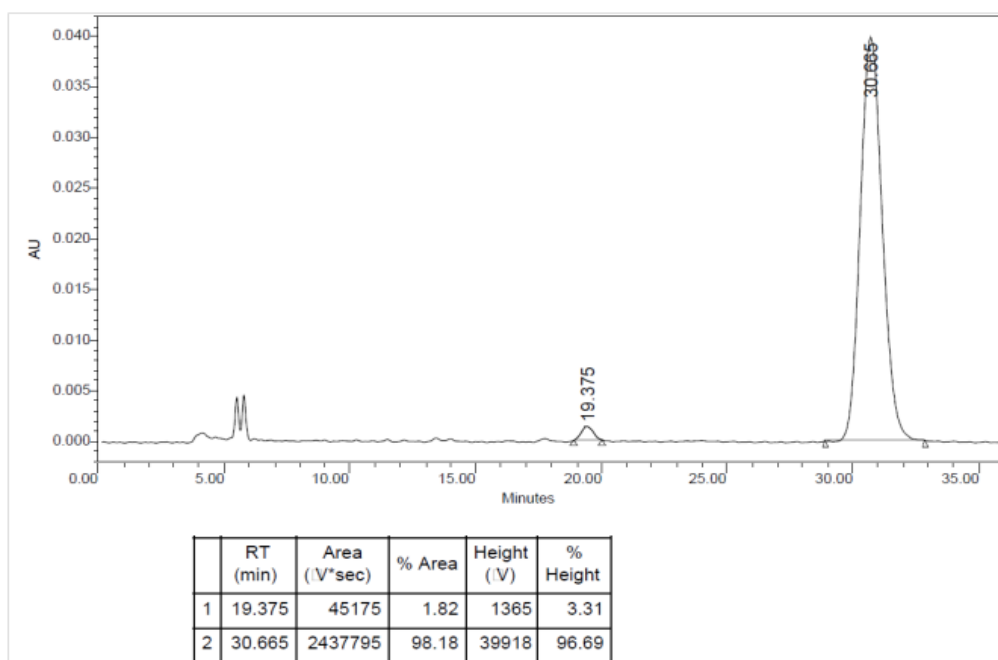

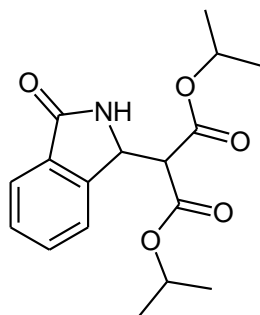

HPLC trace of racemic **3b**:

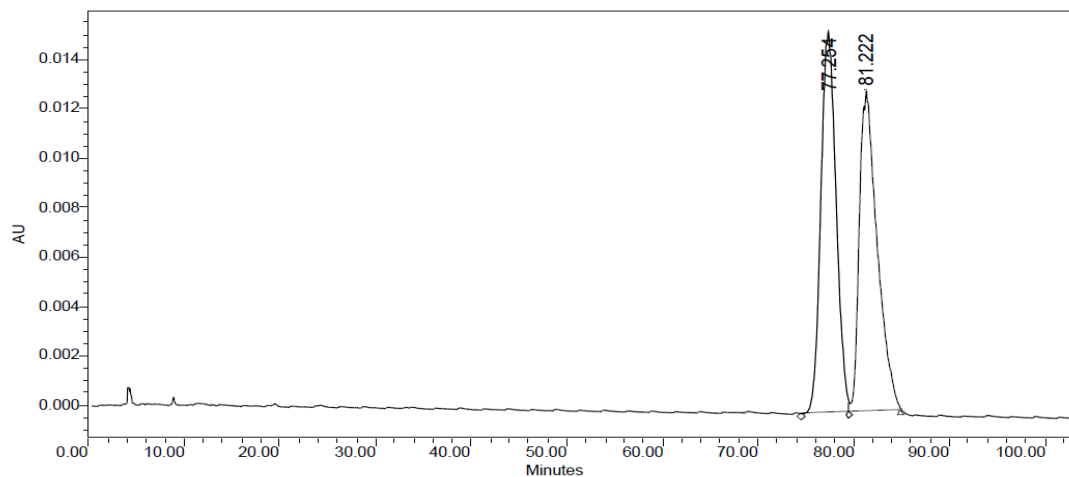

|   | RT (min) | Area (V*sec) | % Area | Height (V) | % Height |
|---|----------|--------------|--------|------------|----------|
| 1 | 77.254   | 1714466      | 50.47  | 15440      | 54.29    |
| 2 | 81.222   | 1682761      | 49.53  | 13001      | 45.71    |

HPLC trace of enantioenriched **3b**:

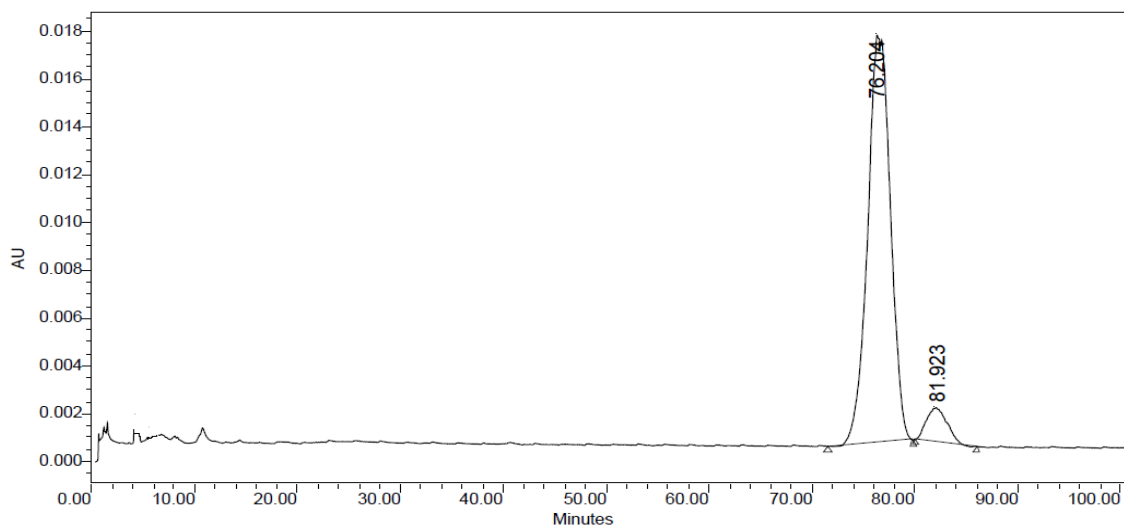

|   | RT (min) | Area (V*sec) | % Area | Height (V) | % Height |
|---|----------|--------------|--------|------------|----------|
| 1 | 76.204   | 2631133      | 93.07  | 17048      | 92.35    |
| 2 | 81.923   | 195816       | 6.93   | 1412       | 7.65     |

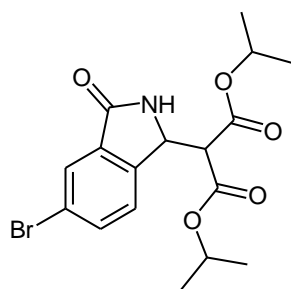

HPLC trace of racemic **3d**:

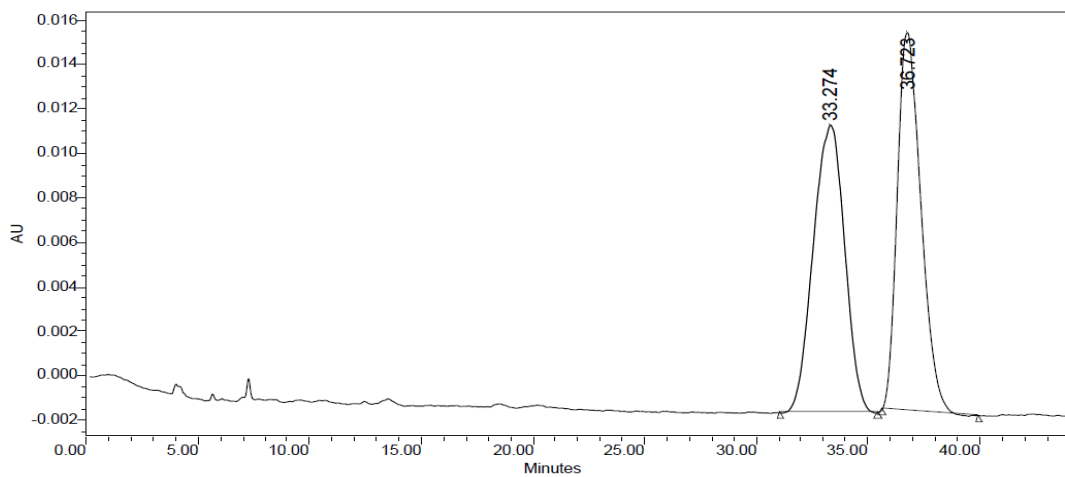

|   | RT (min) | Area (UV*sec) | % Area | Height (UV) | % Height |
|---|----------|---------------|--------|-------------|----------|
| 1 | 33.274   | 1269266       | 50.27  | 12949       | 43.21    |
| 2 | 36.723   | 1255552       | 49.73  | 17021       | 56.79    |

HPLC trace of enantioenriched **3d**:

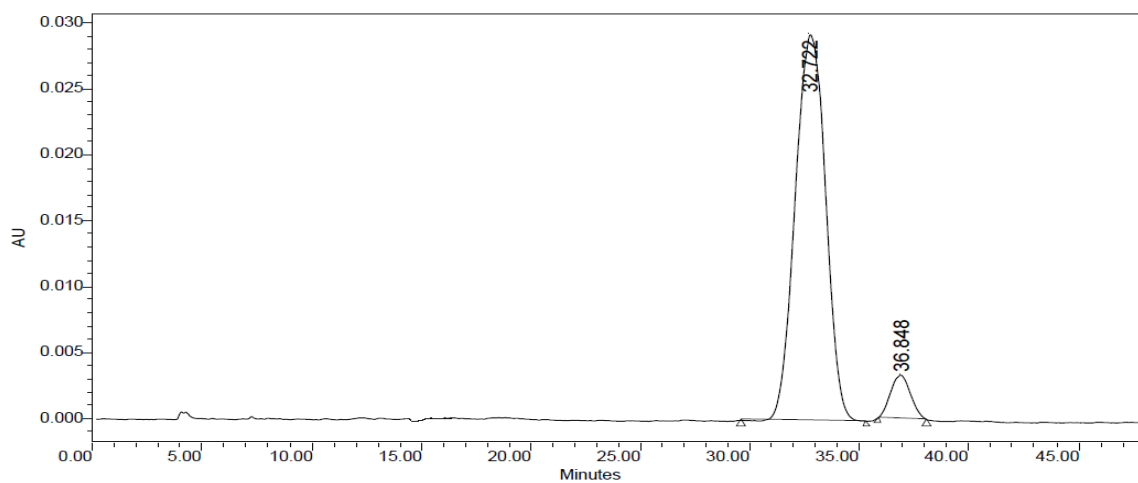

|   | RT (min) | Area (UV*sec) | % Area | Height (UV) | % Height |
|---|----------|---------------|--------|-------------|----------|
| 1 | 32.722   | 2840962       | 93.12  | 29277       | 89.88    |
| 2 | 36.848   | 210031        | 6.88   | 3297        | 10.12    |



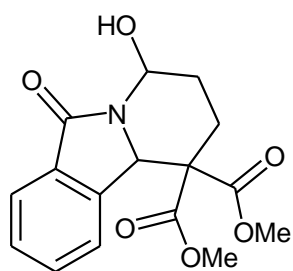

HPLC trace of racemic **5a**:

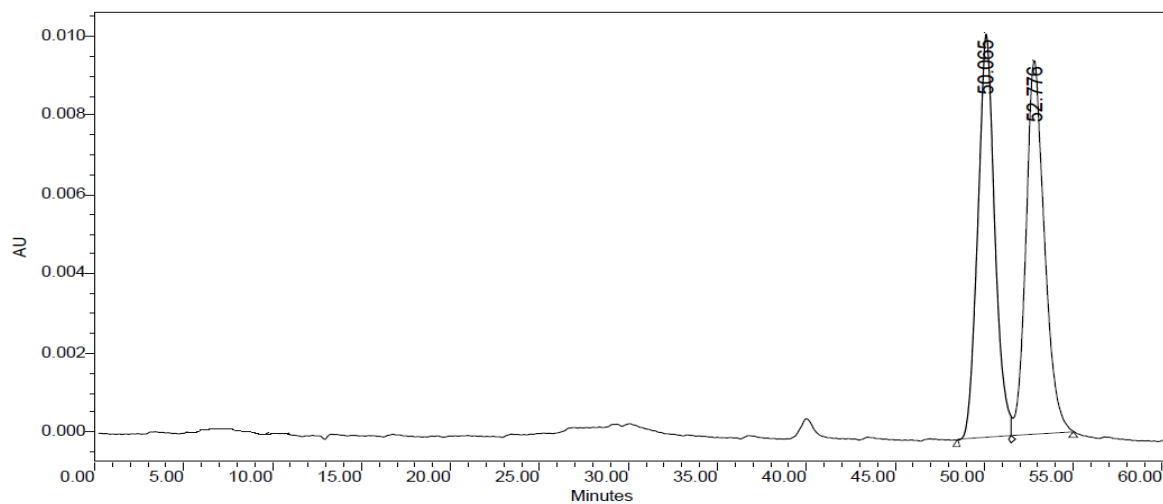

|   | RT (min) | Area (ΔV*sec) | % Area | Height (ΔV) | % Height |
|---|----------|---------------|--------|-------------|----------|
| 1 | 50.065   | 679079        | 49.78  | 10197       | 51.91    |
| 2 | 52.776   | 684993        | 50.22  | 9445        | 48.09    |

HPLC trace of enantioenriched **5a**:

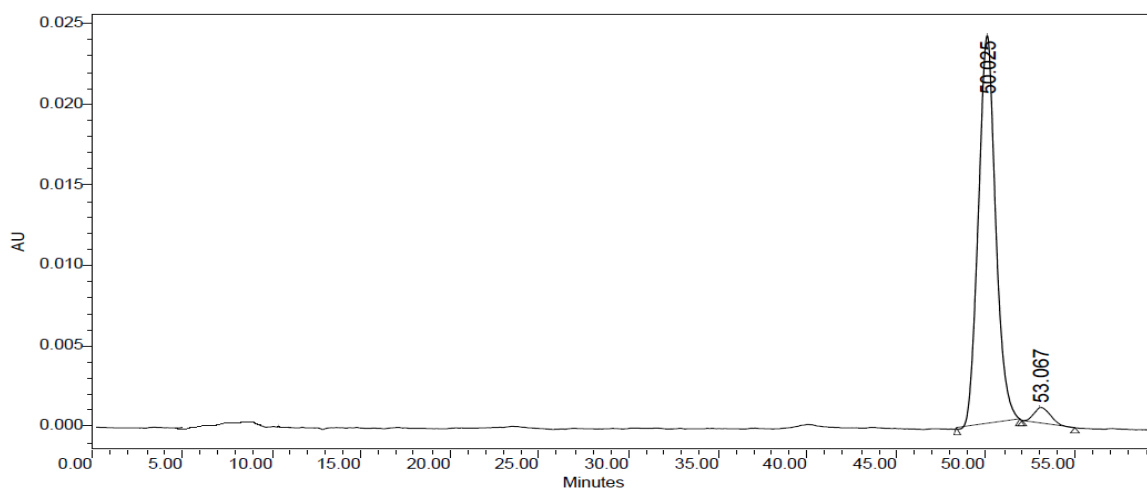

|   | RT (min) | Area (ΔV*sec) | % Area | Height (ΔV) | % Height |
|---|----------|---------------|--------|-------------|----------|
| 1 | 50.025   | 1631089       | 96.39  | 24183       | 96.17    |
| 2 | 53.067   | 61162         | 3.61   | 964         | 3.83     |

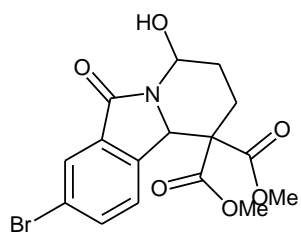

HPLC trace of racemic **5b**:

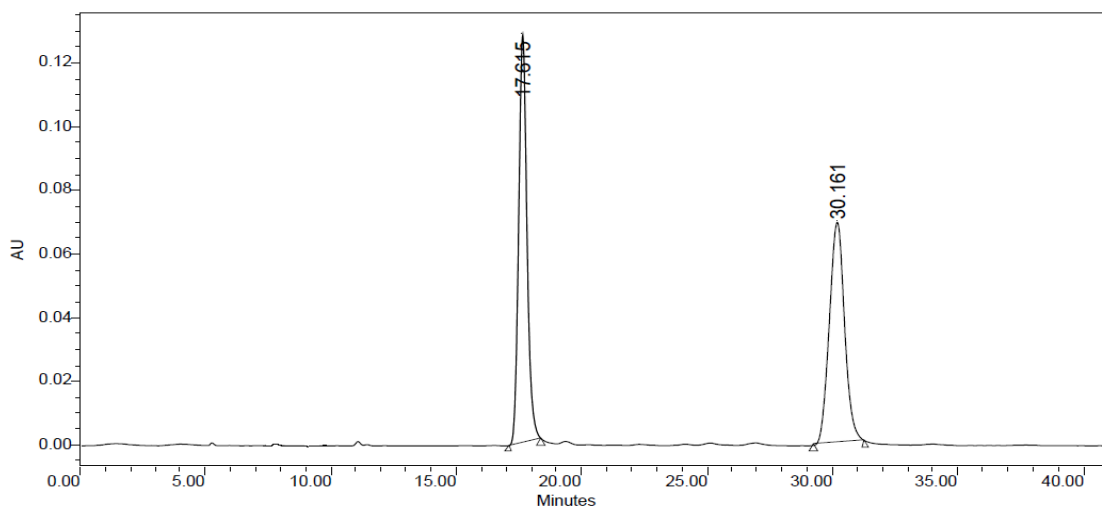

|   | RT (min) | Area (V*sec) | % Area | Height (V) | % Height |
|---|----------|--------------|--------|------------|----------|
| 1 | 17.615   | 2970998      | 50.22  | 128250     | 64.87    |
| 2 | 30.161   | 2945296      | 49.78  | 69461      | 35.13    |

HPLC trace of enantioenriched **5b**:

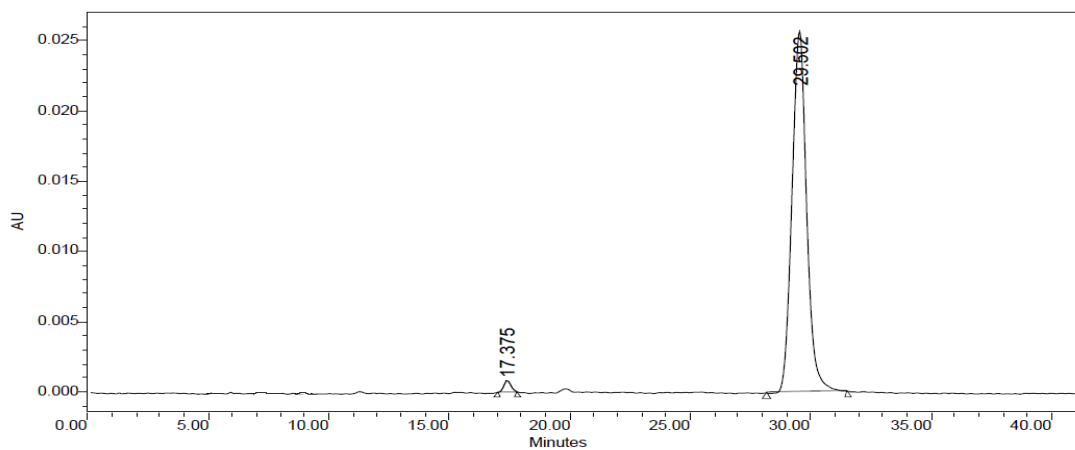

|   | RT (min) | Area (V*sec) | % Area | Height (V) | % Height |
|---|----------|--------------|--------|------------|----------|
| 1 | 17.375   | 17607        | 1.59   | 823        | 3.11     |
| 2 | 29.502   | 1089500      | 98.41  | 25669      | 96.89    |

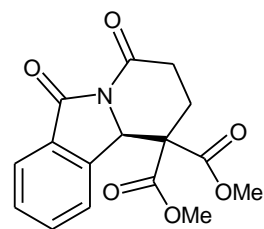

HPLC trace of racemic **6**:

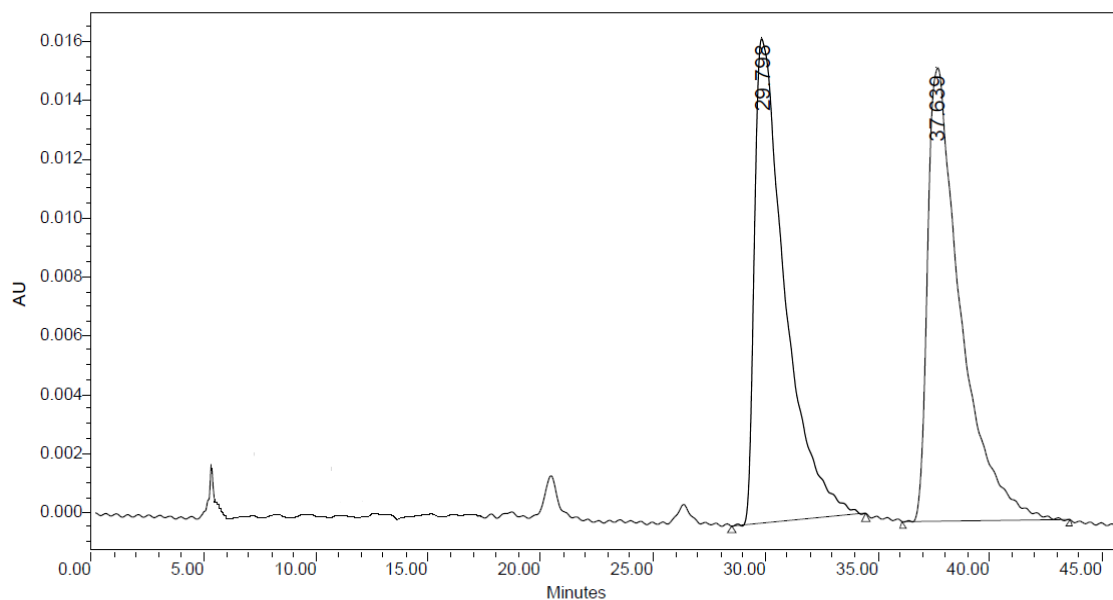

|   | RT (min) | Area (V*sec) | % Area | Height (V) | % Height |
|---|----------|--------------|--------|------------|----------|
| 1 | 29.798   | 1560902      | 49.70  | 16476      | 51.65    |
| 2 | 37.639   | 1579994      | 50.30  | 15425      | 48.35    |

HPLC trace of enantioenriched **6**:

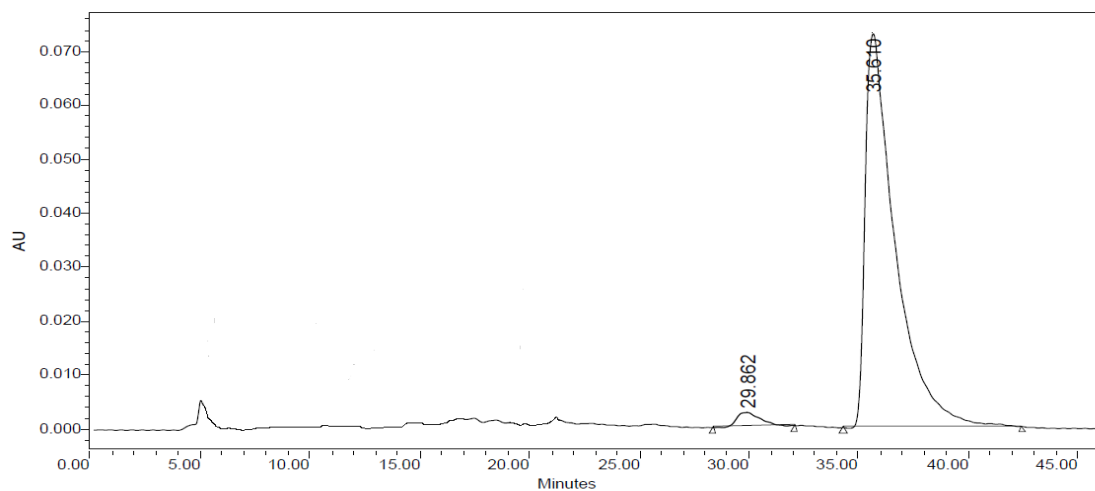

|   | RT (min) | Area (V*sec) | % Area | Height (V) | % Height |
|---|----------|--------------|--------|------------|----------|
| 1 | 29.862   | 203768       | 2.84   | 2670       | 3.53     |
| 2 | 35.610   | 6966598      | 97.16  | 72995      | 96.47    |

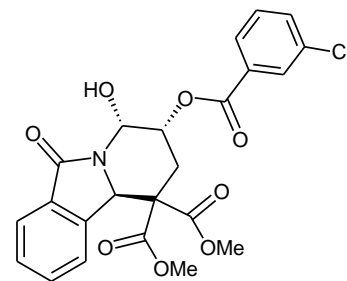

HPLC trace of racemic **8**:

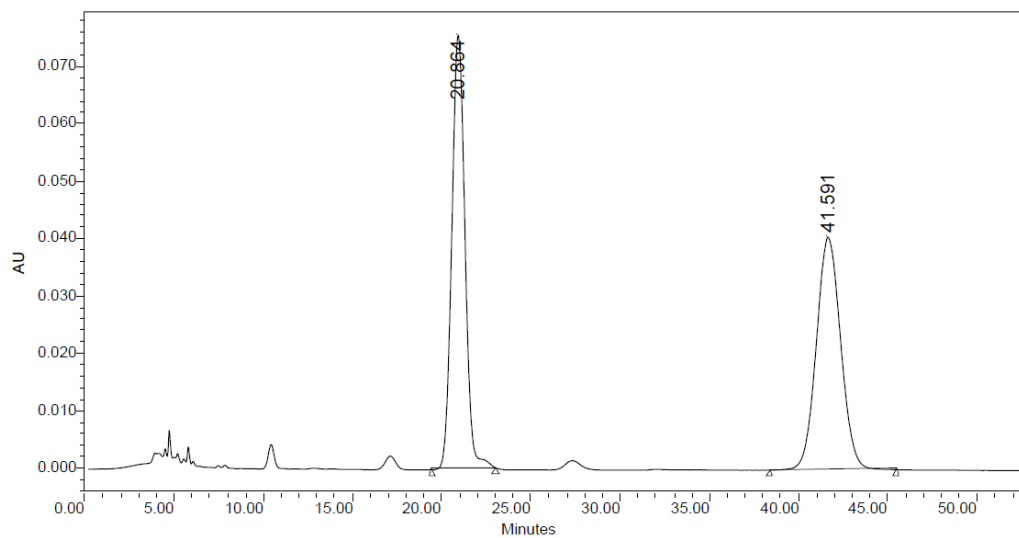

|   | RT<br>(min) | Area<br>(V*sec) | % Area | Height<br>(V) | %<br>Height |
|---|-------------|-----------------|--------|---------------|-------------|
| 1 | 20.864      | 3882831         | 50.21  | 75594         | 65.08       |
| 2 | 41.591      | 3850441         | 49.79  | 40565         | 34.92       |

HPLC trace of enantioenriched **8**:

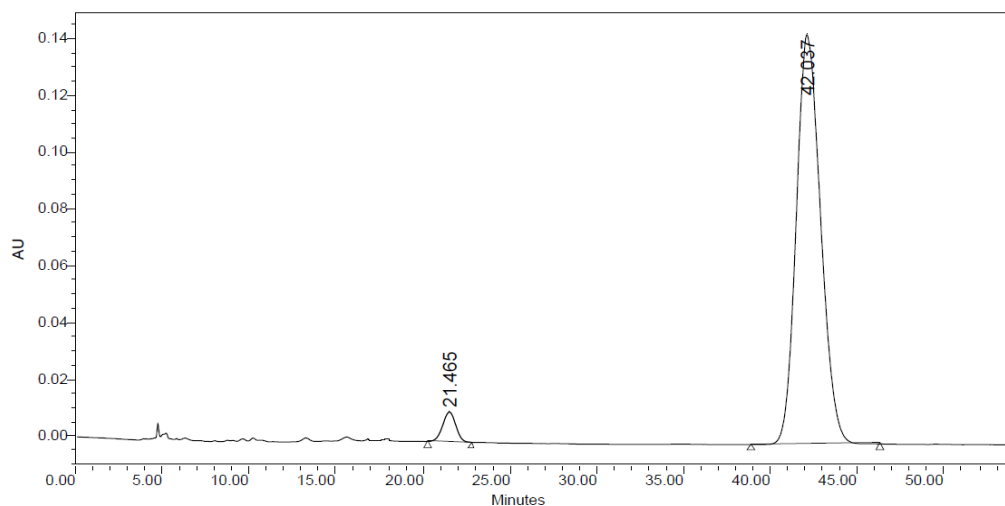

|   | RT<br>(min) | Area<br>(V*sec) | % Area | Height<br>(V) | %<br>Height |
|---|-------------|-----------------|--------|---------------|-------------|
| 1 | 21.465      | 550426          | 3.76   | 10455         | 6.76        |
| 2 | 42.037      | 14070482        | 96.24  | 144235        | 93.24       |

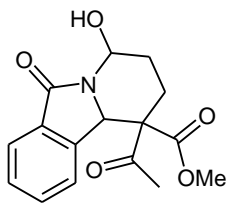

HPLC trace of racemic **11a**:

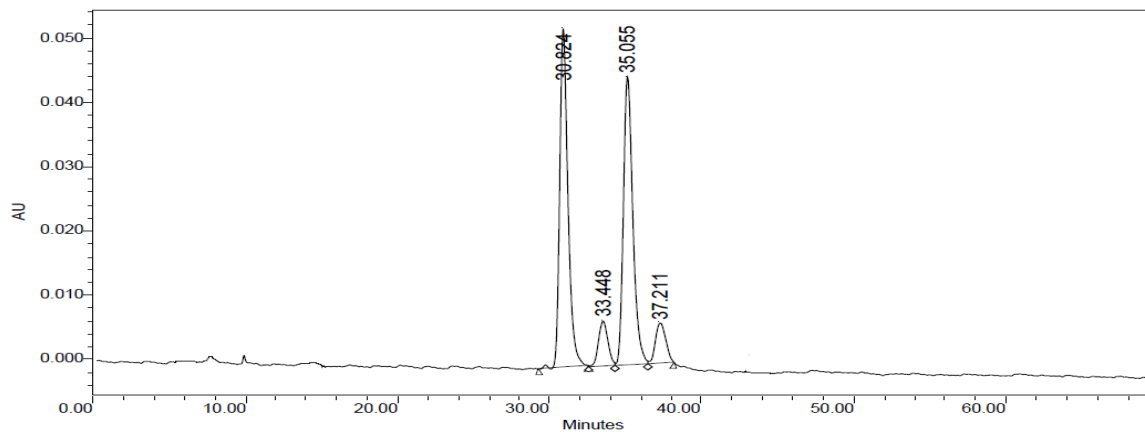

|   | RT (min) | Area (ΔV*sec) | % Area | Height (ΔV) | % Height |
|---|----------|---------------|--------|-------------|----------|
| 1 | 30.824   | 1999380       | 43.77  | 52711       | 47.47    |
| 2 | 33.448   | 310501        | 6.80   | 7075        | 6.37     |
| 3 | 35.055   | 1952083       | 42.73  | 44876       | 40.42    |
| 4 | 37.211   | 306118        | 6.70   | 6369        | 5.74     |

HPLC trace of enantioenriched **11a**:

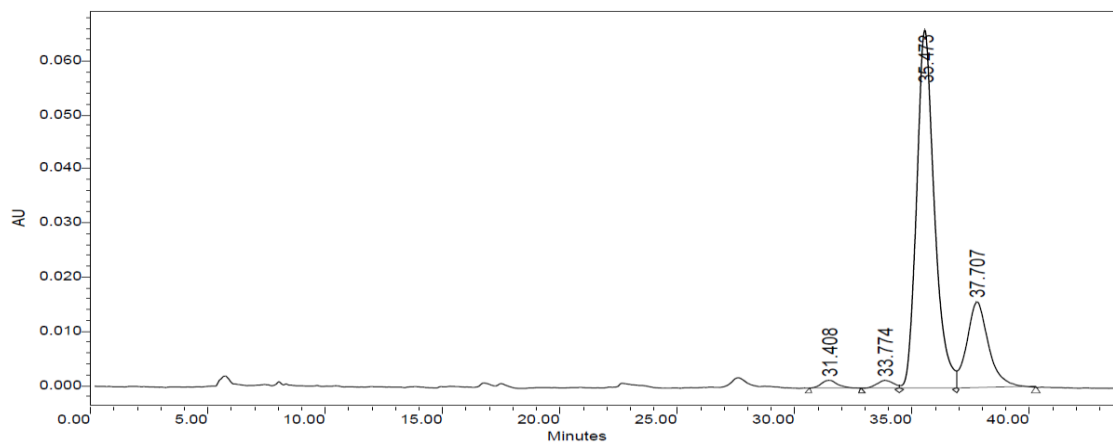

|   | RT (min) | Area (ΔV*sec) | % Area | Height (ΔV) | % Height |
|---|----------|---------------|--------|-------------|----------|
| 1 | 31.408   | 71194         | 1.53   | 1460        | 1.72     |
| 2 | 33.774   | 71774         | 1.54   | 1435        | 1.69     |
| 3 | 35.473   | 3481778       | 74.85  | 66124       | 77.92    |
| 4 | 37.707   | 1027237       | 22.08  | 15838       | 18.66    |

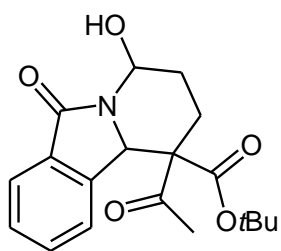

HPLC trace of racemic **11b**.

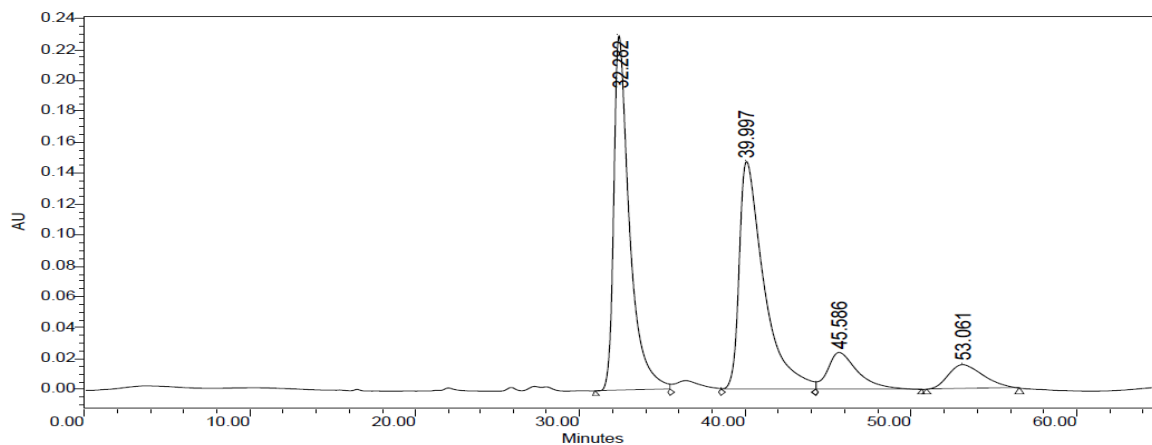

|   | RT (min) | Area (UV*sec) | % Area | Height (UV) | % Height |
|---|----------|---------------|--------|-------------|----------|
| 1 | 32.282   | 15360121      | 42.34  | 229687      | 55.03    |
| 2 | 39.997   | 15488760      | 42.70  | 147947      | 35.44    |
| 3 | 45.586   | 3104800       | 8.56   | 24129       | 5.78     |
| 4 | 53.061   | 2323272       | 6.40   | 15659       | 3.75     |

HPLC trace of enantioenriched **11b**.

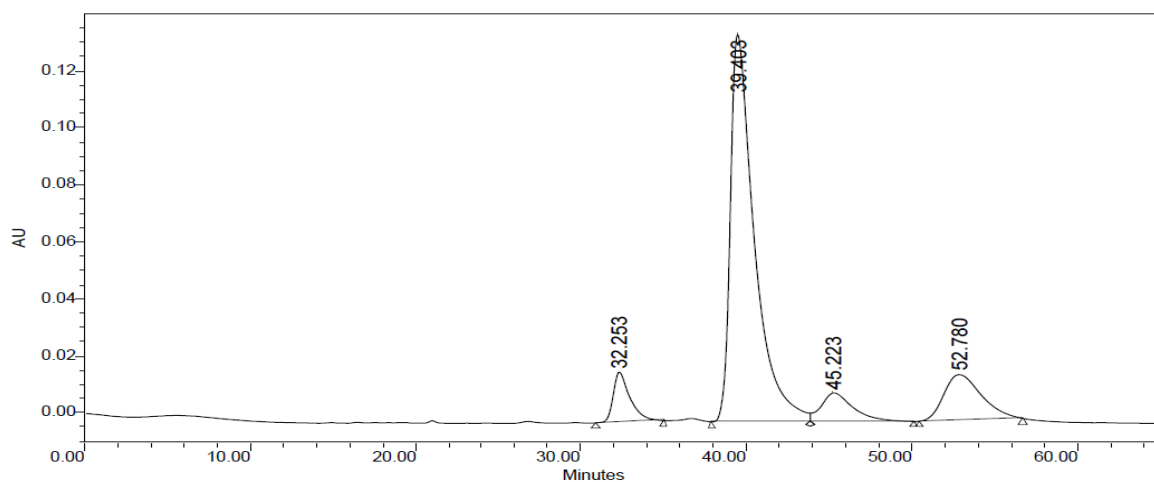

|   | RT (min) | Area (UV*sec) | % Area | Height (UV) | % Height |
|---|----------|---------------|--------|-------------|----------|
| 1 | 32.253   | 1235958       | 6.55   | 17508       | 9.76     |
| 2 | 39.403   | 13751416      | 72.84  | 135932      | 75.75    |
| 3 | 45.223   | 1360164       | 7.20   | 10059       | 5.61     |
| 4 | 52.780   | 2531939       | 13.41  | 15960       | 8.89     |

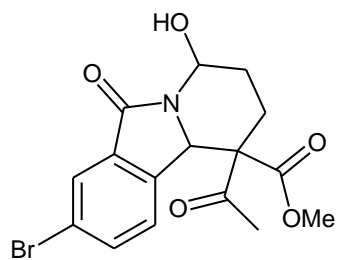

HPLC trace of racemic **11c**

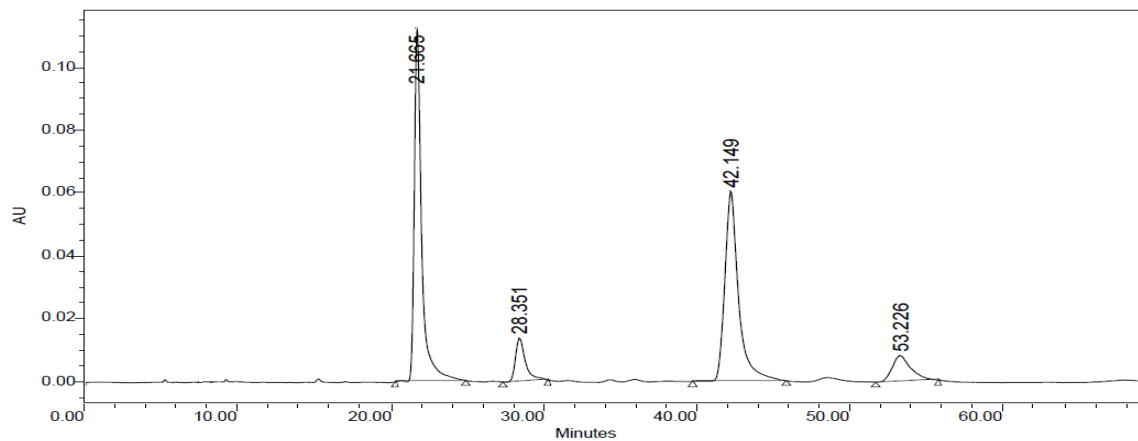

|   | RT (min) | Area (UV*sec) | % Area | Height (UV) | % Height |
|---|----------|---------------|--------|-------------|----------|
| 1 | 21.665   | 3760040       | 42.45  | 111939      | 57.65    |
| 2 | 28.351   | 630552        | 7.12   | 13668       | 7.04     |
| 3 | 42.149   | 3760766       | 42.46  | 60333       | 31.07    |
| 4 | 53.226   | 705441        | 7.96   | 8217        | 4.23     |

HPLC trace of enantioenriched **11c**:

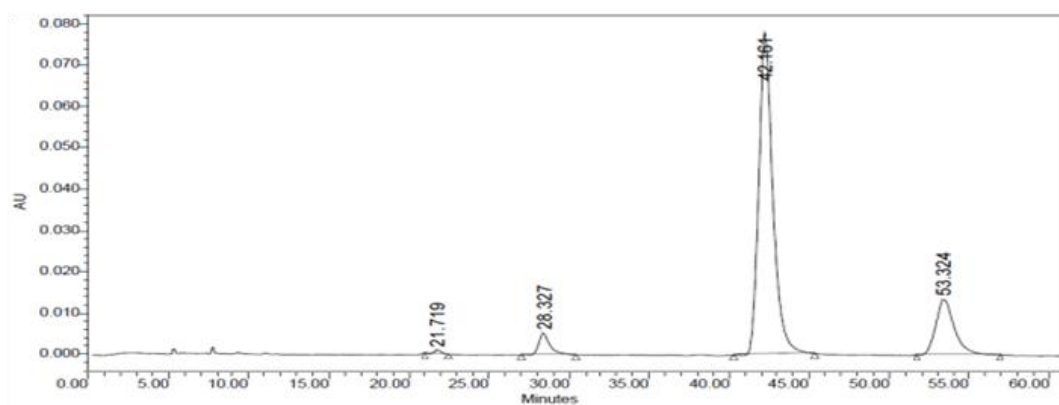

|   | RT (min) | Area (UV*sec) | % Area | Height (UV) | % Height |
|---|----------|---------------|--------|-------------|----------|
| 1 | 21.719   | 27488         | 0.45   | 919         | 0.94     |
| 2 | 28.327   | 258071        | 4.18   | 5269        | 5.39     |
| 3 | 42.161   | 4783532       | 77.48  | 78059       | 79.89    |
| 4 | 53.324   | 1104912       | 17.90  | 13457       | 13.77    |

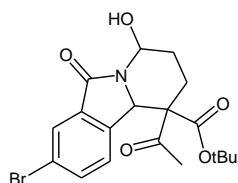

HPLC trace of racemic **11d**:

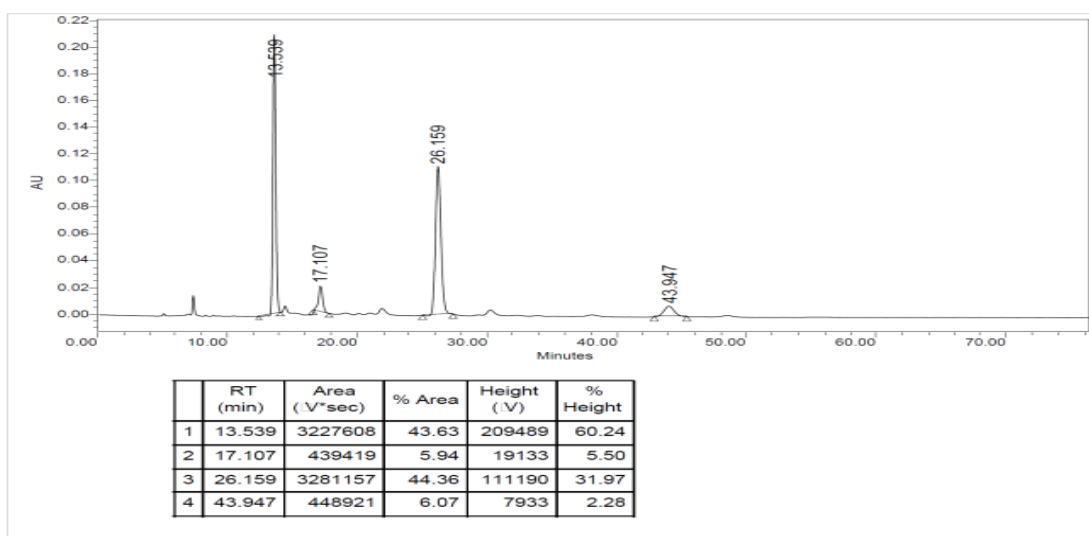

HPLC trace of enantioenriched **11d**:

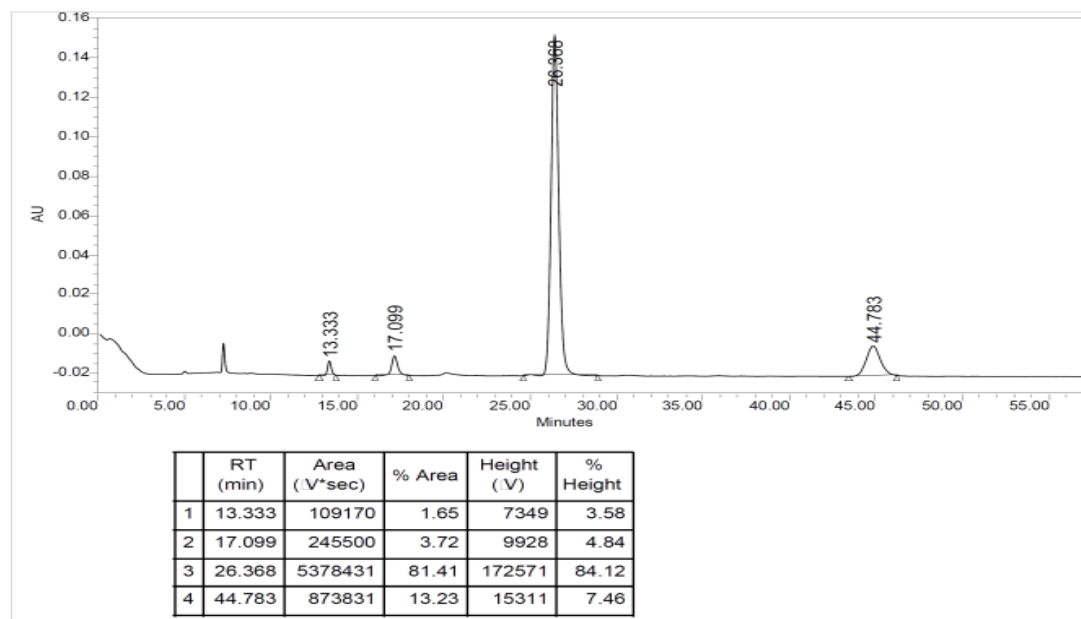

Supplement: c3ra43074j.pdf [file c3ra43074j.pdf]
